# Supplementary material for: Critical Review of Health Impacts of Wildfire Smoke Exposure
Source: Environ Health Perspect. 2016 Apr 15;124(9):1334–43. doi: 10.1289/ehp.1409277 (PMC5010409; doi:10.1289/ehp.1409277)
Supplement: (916 KB) PDF [file ehp.1409277.s001.acco.pdf]

**Note to readers with disabilities:** *EHP* strives to ensure that all journal content is accessible to all readers. However, some figures and Supplemental Material published in *EHP* articles may not conform to [508 standards](#) due to the complexity of the information being presented. If you need assistance accessing journal content, please contact [ehp508@niehs.nih.gov](mailto:ehp508@niehs.nih.gov). Our staff will work with you to assess and meet your accessibility needs within 3 working days.

## **Supplemental Material**

### **Critical Review of Health Impacts of Wildfire Smoke Exposure**

Colleen E. Reid, Michael Brauer, Fay Johnston, Michael Jerrett, John R. Balmes, and Catherine T. Elliott

#### **Table of Contents**

**Table S1.** Assessment of Risk of Bias for all epidemiological studies reviewed (N=53)

**Table S2.** Effect estimates for original epidemiological research studies (N=53), regardless of level of potential bias, ordered by health outcome and type of effect estimate.

#### **References**

Table S1: Assessment of Risk of Bias for all epidemiological studies reviewed (N=53)

| Article              | Fire Event/Location                                                     | Sample Size                                                                    | Exposure Assessment Method                                                                                                                                                                                                   | Exposure Levels                                             | Covariates controlled for                                                                                               | Outcomes                                        | Risk of Bias | Comment on Risk of Bias                                                                                                                             |
|----------------------|-------------------------------------------------------------------------|--------------------------------------------------------------------------------|------------------------------------------------------------------------------------------------------------------------------------------------------------------------------------------------------------------------------|-------------------------------------------------------------|-------------------------------------------------------------------------------------------------------------------------|-------------------------------------------------|--------------|-----------------------------------------------------------------------------------------------------------------------------------------------------|
| Analitis et al. 2011 | Athens 1998-2004                                                        | 1071 days; Average number of deaths per day = 73 and                           | Categorized days with large fires (fires greater than 30,000,000 m <sup>3</sup> ), medium fires (1,000,001-30,000,000 m <sup>3</sup> ), and small fires (10,000 – 1,000,000 m <sup>3</sup> ), compared to days with no fires | No smoke levels reported                                    | PM, temperature, heat wave day, RH, wind speed, wind direction, day of week, holidays and seasonal and long-term trend. | mortality, all-cause                            | higher       | Exposure assessment method may not be related to smoke exposure; adjustment for black smoke may have attenuated impacts of wildfire-generated smoke |
| Arbex et al. 2000    | Araraquara, Brazil, sugarcane burning season June 1-August 31, 1995     | 97 days with an average number of hospital visits for inhalation therapy of 22 | Gravimetric analysis of particles centrifuged daily from water in receptacles placed at two sites in Araraquara.                                                                                                             | 12.9 ±7.0 mg sediment per day                               | Seasonality, temperature, day of week, precipitation                                                                    | Hospital visits for inhalation therapy          | moderate     | Exposure assessment method is unique to this study and only yielded the largest particles, as noted by the authors                                  |
| Arbex et al. 2007    | Araraquara, São Paulo State, Brazil, from 23 March 2003 to 27 July 2004 | 493 days and a total of 640 asthma hospitalizations                            | TSP from one monitor downtown                                                                                                                                                                                                | Mean TSP = 46.8 ± 26.4 µg/m <sup>3</sup>                    | long-term trend, temperature, humidity                                                                                  | hospitalizations, asthma                        | lower        |                                                                                                                                                     |
| Arbex et al. 2010    | Araraquara, Brazil 23 March 2003 to 27 July 2004                        | 493 days and mean of 2.5 hypertension – related hospital admissions per day    | TSP from one monitor downtown                                                                                                                                                                                                | Burning period TSP mean 56.866 ± 25.07 µg/m <sup>3</sup>    | long-term trend, temp, RH                                                                                               | hospitalizations, hypertension                  | lower        |                                                                                                                                                     |
| Azevedo et al. 2011  | Portugal 2005                                                           | 350 days                                                                       | One central monitor                                                                                                                                                                                                          | 42 days in 2005 had ozone levels over 180 µg/m <sup>3</sup> | Ozone, PM <sub>10</sub> , SO <sub>2</sub> , NO, CO, NO <sub>2</sub> , PM <sub>2.5</sub>                                 | Respiratory and cardiovascular hospitalizations | higher       | Models not adjusted for temporal trend, seasonality, day of week, or temperature effects. Multipollutant                                            |

|                              |                                                                                                               |                                                                                                                                                                                                                                                                             |                                                                                                                                                                        |                                                                                                                                          |                                                                                    |                                                                        |        |                                                                                                                           |
|------------------------------|---------------------------------------------------------------------------------------------------------------|-----------------------------------------------------------------------------------------------------------------------------------------------------------------------------------------------------------------------------------------------------------------------------|------------------------------------------------------------------------------------------------------------------------------------------------------------------------|------------------------------------------------------------------------------------------------------------------------------------------|------------------------------------------------------------------------------------|------------------------------------------------------------------------|--------|---------------------------------------------------------------------------------------------------------------------------|
|                              |                                                                                                               |                                                                                                                                                                                                                                                                             |                                                                                                                                                                        |                                                                                                                                          |                                                                                    |                                                                        |        | models without dealing with collinearity.                                                                                 |
| Caamano-Isorna et al. 2011   | August 2006 Galician Fires                                                                                    | 4212 municipality-months (156 municipalities *27 months); did not give average daily doses of each drug per 1000 inhabitants for these municipalities but did for all of Spain: 46.51 for anxiolytics, 22.19 for hypnotics, and 45 for drugs for obstructive airway disease | Number of wildfires within a municipality used to classified municipalities into no exposure (0-3 wildfires), medium exposure (4-10) and high exposure (more than 10). | No air quality exposure assessment                                                                                                       | Interaction of exposure and time period, time trend, sex and age by stratification | drug dispensations for anxiolytics and for obstructive airway diseases | higher | Exposure assessment of number of fires in a region may not represent fire smoke exposure and no assessment of air quality |
| Cançado et al. 2006          | Piracicaba in southeast Brazil. From April 1997 through March 1998                                            | 306 days; mean daily hospital admissions for children was 2.2 and for elderly was 0.9                                                                                                                                                                                       | PM <sub>10</sub> , PM <sub>2.5</sub> and speciated PM information that was used in factor analysis to determine sources                                                | Not reported for the biomass burning factor                                                                                              | long-term trend, day of week, temperature, RH                                      | hospitalization, respiratory                                           | lower  |                                                                                                                           |
| Candido da Silva et al. 2014 | Retrospective cohort of births in cities in Mato Grosso State, Brazil from July 1, 2004 and December 31, 2005 | 6147 full-term live births                                                                                                                                                                                                                                                  | PM <sub>2.5</sub> from one monitoring station                                                                                                                          | Average PM <sub>2.5</sub> levels in 2004 of $21.7 \pm 35.2 \mu\text{g}/\text{m}^3$ and in 2005 of $18.1 \pm 33.7 \mu\text{g}/\text{m}^3$ | Sex, mother's education, prenatal visits, type of delivery, and age group          | Low birth weight                                                       | lower  |                                                                                                                           |
| Chen et al. 2006             | July 1 1997 to December 31                                                                                    | 1222 days with median of 33                                                                                                                                                                                                                                                 | PM <sub>10</sub> from one of five monitoring sites                                                                                                                     | Mean daily PM <sub>10</sub> = $16.11 \mu\text{g}/\text{m}^3$ , range =                                                                   | Temperature, seasonality, day                                                      | hospitalization, respiratory                                           | lower  |                                                                                                                           |

|                       |                                               |                                                                                                                                                    |                                                                                                                                                                                                                                                                                                                                                                                                                                                                                                                                                                                                                                      |                                                                                        |                                                                                                                            |                                                                       |          |                                                                                                                           |
|-----------------------|-----------------------------------------------|----------------------------------------------------------------------------------------------------------------------------------------------------|--------------------------------------------------------------------------------------------------------------------------------------------------------------------------------------------------------------------------------------------------------------------------------------------------------------------------------------------------------------------------------------------------------------------------------------------------------------------------------------------------------------------------------------------------------------------------------------------------------------------------------------|----------------------------------------------------------------------------------------|----------------------------------------------------------------------------------------------------------------------------|-----------------------------------------------------------------------|----------|---------------------------------------------------------------------------------------------------------------------------|
|                       | 2000, Brisbane Australia                      | patients per day admitted to hospital for respiratory disease                                                                                      |                                                                                                                                                                                                                                                                                                                                                                                                                                                                                                                                                                                                                                      | 4.90 – 60.60                                                                           | of week, long term trend, influenza                                                                                        |                                                                       |          |                                                                                                                           |
| Cooper et al. 1994    | January 1994 Sydney fire (10 day event)       | Data only shown in graphical form                                                                                                                  | hourly average scattering coefficient from a nephelometer used to distinguish before, during and after fires                                                                                                                                                                                                                                                                                                                                                                                                                                                                                                                         | Only shown in graphical form                                                           | None reported                                                                                                              | acute asthma hospital presentations                                   | higher   | Periods compared had different days of week, did not control for temperature, and not enough information given on methods |
| Delfino et al. 2009   | Southern California 2003                      | Unit of analysis is ZIP code-day. There were 45 days in the analysis, but does not state number of ZIP codes. Population covered was 20.5 million. | Zip code level PM <sub>2.5</sub> estimates from spatial interpolations from measured PM <sub>2.5</sub> , light extinction, meteorological conditions and smoke information from MODIS satellite. Missing values were estimated from temporal profiles of continuous PM monitors at closely located sites or light extinction from visibility data, meteorological conditions and smoke info from MODIS. For nonfire periods, spatial interpolations using IDW, kriging or cokriging, but during fire polygons were created to represent the fire densities and PM <sub>2.5</sub> concentrations in each smoke-polygon were assigned. | During fires modeled mean PM <sub>2.5</sub> ranged from 42.1 to 76.1 µg/m <sup>3</sup> | Temperature, relative humidity, pressure gradient, fungal spores (asthma only), income, age, race, gender, weekend, county | Hospitalizations for various respiratory and cardiovascular endpoints | lower    |                                                                                                                           |
| Dennekamp et al. 2015 | 2006-2007 bushfire season Victoria, Australia | 2046 out-of-hospital cardiac arrests                                                                                                               | PM <sub>2.5</sub> from one monitoring station                                                                                                                                                                                                                                                                                                                                                                                                                                                                                                                                                                                        | IQR of PM <sub>2.5</sub> = 6.1 µg/m <sup>3</sup>                                       | Temperature, relative humidity, month, day of week, and hour of day.                                                       | out of hospital cardiac arrest                                        | lower    |                                                                                                                           |
| Duclos et al. 1990    | August 1987, lightning fire in Northern       | 699 observed ER visits in 2.5 week fire period                                                                                                     | temporal comparison of the fire period to two referent periods (one the previous month) and                                                                                                                                                                                                                                                                                                                                                                                                                                                                                                                                          | Not reported                                                                           | Seasonal and annual trends                                                                                                 | emergency department visits and                                       | moderate | Did not control for temperature or RH                                                                                     |

|                       |                                                                       |                                                                                                                                                       |                                                                                                                                                                                                                                                                                                                                                                                                                                                                             |                                                                                                          |                                                                                                                                                       |                                                                                                   |       |  |
|-----------------------|-----------------------------------------------------------------------|-------------------------------------------------------------------------------------------------------------------------------------------------------|-----------------------------------------------------------------------------------------------------------------------------------------------------------------------------------------------------------------------------------------------------------------------------------------------------------------------------------------------------------------------------------------------------------------------------------------------------------------------------|----------------------------------------------------------------------------------------------------------|-------------------------------------------------------------------------------------------------------------------------------------------------------|---------------------------------------------------------------------------------------------------|-------|--|
|                       | California                                                            |                                                                                                                                                       | one in the previous year at the same time                                                                                                                                                                                                                                                                                                                                                                                                                                   |                                                                                                          |                                                                                                                                                       | hospitalizations for respiratory and mental health effects                                        |       |  |
| Elliott et al. 2013   | British Columbia 2003-2010 during fire seasons (April 1-September 30) | 42456 LHA-days = (29 local health areas (LHAs) * 183 days per year * 8 years); average daily salbutamol dispensations ranged from 4.3 to 103.4 by LHA | PM <sub>2.5</sub> from one station per LHA, either the one nearest its centroid or its only one. For areas that didn't have PM <sub>2.5</sub> for the whole period, converted PM <sub>10</sub> to PM <sub>2.5</sub> using regressions for the time period with both, or if no PM <sub>2.5</sub> then the regression from all of the other LHAs. Also dichotomized LHAs as fire affected by using MODIS fire pixels and chose the ones that were regularly impacted by fire. | Maximum concentrations of PM <sub>2.5</sub> in fire affected LHAs ranged 33.4 to 248.1 µg/m <sup>3</sup> | Temperature, RH, year, month, and day of week                                                                                                         | drug dispensations, salbutamol sulfate                                                            | lower |  |
| Faustini et al. 2015  | Ten cities in Spain, Italy, and Greece                                | 20,087 study days across ten cities; daily mean natural deaths = 36                                                                                   | Smoky days versus non-smoky days classified from NAAP model (derived from AOD and fire plumes)                                                                                                                                                                                                                                                                                                                                                                              | Smoky days PM <sub>10</sub> ranged from 8-16 µg/m <sup>3</sup>                                           | Year, month, day of week, holidays, influenza, temperature, Saharan dust                                                                              | Mortality                                                                                         | lower |  |
| Haikerwal et al. 2015 | 2006-2007 wildfire episode in Victoria, Australia                     | 457 out-of-hospital cardiac arrests; 2106 ED visits for IHD and 3274 hospital admissions for IHD                                                      | PM <sub>2.5</sub> modeled from a global chemical transport model dynamically downscaled using The Air Pollution Model                                                                                                                                                                                                                                                                                                                                                       | PM <sub>2.5</sub> mean levels = 15.43 µg/m <sup>3</sup> (IQR = 9.04 µg/m <sup>3</sup> )                  | Time-stratified case control study controlled for day of week, seasons, time trends and individual covariates, also controlled for temperature and RH | Out-of hospital cardiac arrests, and hospitalizations and ED visits for IHD, acute MI, and angina | lower |  |
| Hanigan et al. 2008   | fire seasons, 1996-2005 Darwin, Australia                             | 2410 days; 8279 hospital admissions                                                                                                                   | model of estimated exposure from visibility data                                                                                                                                                                                                                                                                                                                                                                                                                            | PM <sub>10</sub> mean levels during fire period 21.2 ± 8.2 µg/m <sup>3</sup>                             | RH, temperature, influenza, time trends, indigenous status, holidays                                                                                  | hospitalizations, cardiovascular                                                                  | lower |  |

|                       |                                                      |                                                      |                                                                                                                                                                                                                                                                                                                                     |                                                                       |                                                                                                                                                  |                                                                         |          |                                                             |
|-----------------------|------------------------------------------------------|------------------------------------------------------|-------------------------------------------------------------------------------------------------------------------------------------------------------------------------------------------------------------------------------------------------------------------------------------------------------------------------------------|-----------------------------------------------------------------------|--------------------------------------------------------------------------------------------------------------------------------------------------|-------------------------------------------------------------------------|----------|-------------------------------------------------------------|
| Henderson et al. 2011 | July-September 2003 in British Columbia, fire season | 281,711 people in cohort with 92 days of observation | (1) TEOM PM10 monitors, people assigned to nearest monitor to their postal address, (2) CALPUFF estimates of PM10 based on fire boundaries, and (3) binary smoke variable based on smoke boundaries from NOAA's fire detection tool: if there was a smoke plume over an area at any point during the day, it was considered exposed | PM <sub>10</sub> mean levels 29.4 ± 30.7 µg/m <sup>3</sup>            | Temperature, day of week, week of study                                                                                                          | Respiratory and cardiovascular hospitalizations and physician visits    | lower    |                                                             |
| Ho et al. 2014        | 2013 south Asian haze crisis                         | 298 respondents                                      | Self-report of perceived pollution standard index (PSI) as dangerous                                                                                                                                                                                                                                                                | Highest level pollution standard index of 401 on 0 to 500 scale.      | None reported                                                                                                                                    | Impact of Event Scale – Revised Survey, measure of psychological stress | higher   | Self-report of exposure                                     |
| Holstius et al. 2012  | 2003 Southern California Fires                       | 886,034 births                                       | temporal comparison of before, during and after fires                                                                                                                                                                                                                                                                               | Not reported                                                          | Sex, gestational age, parity, maternal age, maternal education, maternal race, secular trend, season                                             | birth weight                                                            | moderate | Not adjusted for maternal smoking                           |
| Ignotti et al. 2010   | 2004-2005 comparison of states in Brazilian Amazon   | 107 microregions                                     | spatial comparison of % of annual hours with PM <sub>2.5</sub> > 80 µg/m <sup>3</sup>                                                                                                                                                                                                                                               | Assumed a threshold of 80 µg/m <sup>3</sup> based on Oregon standards | Human development index, a measure of education, earned income and longevity; and number of blood counts, an indicator of health service quality | hospitalization, respiratory                                            | moderate | Did not control for meteorology/season and smoke prevalence |
| Jacobson et al. 2012  | August to September 2006, Alta Floresta Brazil       | 309 children                                         | PM <sub>2.5</sub> hourly measurements converted to 5-hour, 6-hour, 12-hour and 24-hour averages.                                                                                                                                                                                                                                    | PM <sub>2.5</sub> mean levels = 24.34 ± 19.25 µg/m <sup>3</sup>       | age, height, weight, asthma status, passive smoking, use of                                                                                      | lung function                                                           | lower    |                                                             |

|                       |                                                                  |                                                                                    |                                                                                                                  |                                                                       |                                                                                                                                                                 |                                     |          |                                                                                                  |
|-----------------------|------------------------------------------------------------------|------------------------------------------------------------------------------------|------------------------------------------------------------------------------------------------------------------|-----------------------------------------------------------------------|-----------------------------------------------------------------------------------------------------------------------------------------------------------------|-------------------------------------|----------|--------------------------------------------------------------------------------------------------|
|                       |                                                                  |                                                                                    |                                                                                                                  |                                                                       | medication, temperature, humidity, gender, occurrence of respiratory infections                                                                                 |                                     |          |                                                                                                  |
| Jacobson et al. 2014  | August to November 2008, Tangara da Serra, Brazil                | 234 children                                                                       | PM <sub>10</sub> and PM <sub>2.5</sub> and black carbon from one monitor at the school                           | PM <sub>10</sub> mean levels = $62.7 \pm 40.7 \mu\text{g}/\text{m}^3$ | Time trends, temperature, humidity                                                                                                                              | Lung function                       | lower    |                                                                                                  |
| Jalaludin et al. 2000 | January 1994 Sydney                                              | 32 children for 31 days                                                            | PM <sub>10</sub> from the monitor closest to each child's school                                                 | Not reported                                                          | Bushfire period, asthma medication usage, time trend, temperature, humidity, pollen counts, alternaria counts                                                   | lung function                       | moderate | Small sample size and duration                                                                   |
| Jayachandran 2009     | 1997 Southeast Asian Fires                                       | 67,454 subdistrict-months; average size of birth cohort 95.6 per subdistrict-month | Aerosol index from the Total Ozone Mapping Spectrometer (TOMS) by month interpolated to each spatial subdistrict | Not reported                                                          | Subdistrict population, fixed effects for subdistrict and for month, median log of food consumption, rainfall, predicted fertility, fuel use, health facilities | Birth cohort size                   | moderate | Coarse resolution exposure metric that may not have represented ground-level concentrations well |
| Johnston et al. 2002  | Darwin April 1-October 31 2000, a period of minimal rainfall and | 214 days; 256 total asthma presentations                                           | PM <sub>10</sub> averaged from two monitoring stations                                                           | Range of PM <sub>10</sub> = 2.0 to $70 \mu\text{g}/\text{m}^3$        | Influenza, weekends                                                                                                                                             | emergency department visits, asthma | moderate | Did not control for temperature                                                                  |

|                      |                                                            |                                                                                                  |                                                                                                                                                                                                                                                                                                                                       |                                                                         |                                                                                                                           |                                                               |       |  |
|----------------------|------------------------------------------------------------|--------------------------------------------------------------------------------------------------|---------------------------------------------------------------------------------------------------------------------------------------------------------------------------------------------------------------------------------------------------------------------------------------------------------------------------------------|-------------------------------------------------------------------------|---------------------------------------------------------------------------------------------------------------------------|---------------------------------------------------------------|-------|--|
|                      | almost continuous bushfire activity                        |                                                                                                  |                                                                                                                                                                                                                                                                                                                                       |                                                                         |                                                                                                                           |                                                               |       |  |
| Johnston et al. 2006 | seven month period in Darwin, Australia                    | 251 people                                                                                       | PM <sub>2.5</sub> and PM <sub>10</sub> from two monitors                                                                                                                                                                                                                                                                              | PM <sub>10</sub> mean levels 20 ±6.4 µg/m <sup>3</sup>                  | Temperature, humidity, rainfall, pollen count, spore count, influenza rates, weekends, holidays, temporal autocorrelation | Asthma rescue medication usage; oral steroid medication usage | lower |  |
| Johnston et al. 2007 | Darwin, Australia three fire seasons, 2000, 2004, and 2005 | 2466 emergency admissions                                                                        | PM <sub>10</sub> from one monitoring station                                                                                                                                                                                                                                                                                          | Mean PM <sub>10</sub> = 17.4 µg/m <sup>3</sup> , range (1.1 to 70)      | Day of week, month, year, influenza, temperature, humidity, rainfall, holidays                                            | hospitalizations, asthma                                      | lower |  |
| Johnston et al. 2011 | Sydney 1997-2004                                           | 284,326 deaths                                                                                   | Categorized days (high smoke days compared to non-smoke days). Days were classified as 'extreme events' based on if the PM <sub>10</sub> city-wide average from 7 monitoring stations exceeded the 99th percentile for the time series (47.3ug/m3) and the cause of each event was verified to determine days which were due to smoke | Smoke days PM <sub>10</sub> ranged from 47.3 – 114.8 µg/m <sup>3</sup>  | Day of week, month, year, influenza, temperature, humidity                                                                | mortality                                                     | lower |  |
| Johnston et al. 2014 | Sydney 1996-2004                                           | 630,000 ED presentations for respiratory conditions; 370,000 ED presentations for cardiovascular | Categorized days (high smoke days compared to non-smoke days). Days were classified as 'extreme events' based on if the PM <sub>10</sub> city-wide average from 7 monitoring stations exceeded the 99th percentile for the time series (47.3µg/m <sup>3</sup> ) and the cause                                                         | Mean PM <sub>10</sub> on smoke-affected days was 60.5 µg/m <sup>3</sup> | Day of week, month, year, influenza, temperature, dew point, holiday                                                      | ED visits for respiratory and cardiovascular endpoints        | lower |  |

|                       |                                                                    |                                                                                                     |                                                                                                                                                                                                                                                                                                                                       |                                                                                               |                                                                                                                             |                                                                                                 |          |                                             |
|-----------------------|--------------------------------------------------------------------|-----------------------------------------------------------------------------------------------------|---------------------------------------------------------------------------------------------------------------------------------------------------------------------------------------------------------------------------------------------------------------------------------------------------------------------------------------|-----------------------------------------------------------------------------------------------|-----------------------------------------------------------------------------------------------------------------------------|-------------------------------------------------------------------------------------------------|----------|---------------------------------------------|
|                       |                                                                    | conditions                                                                                          | of each event was verified to determine days which were due to smoke                                                                                                                                                                                                                                                                  |                                                                                               |                                                                                                                             |                                                                                                 |          |                                             |
| Lee et al. 2009       | Hoopa Valley Indian Reservation Fire of 1999                       | 1882 clinic visits                                                                                  | One PM <sub>10</sub> monitor and a comparison to the previous year                                                                                                                                                                                                                                                                    | Weekly average PM <sub>10</sub> levels ranged from 12.8 to 363.8 µg/m <sup>3</sup>            | Residence location (in or near reservation) and # of clinic visits in previous year (both done by stratification), age, sex | Respiratory and physician visits, respiratory                                                   | moderate | Did not control for temperature or humidity |
| Linares et al. 2014   | Madrid days with advection from biomass burning from 2004-2009     | 2192 days                                                                                           | Effect of PM <sub>10</sub> on mortality on days with advection of biomass burning                                                                                                                                                                                                                                                     | Mean PM <sub>10</sub> on days with advection was 44.2 µg/m <sup>3</sup>                       | Ozone, temperature, trend, seasonality                                                                                      | Mortality                                                                                       | lower    |                                             |
| Marshall et al. 2007  | 2003 Southern California Fires                                     | 357 respondents                                                                                     | self-reported difficulty breathing because of smoke or ashes                                                                                                                                                                                                                                                                          | Not reported                                                                                  | Age, gender, race/ethnicity, education, employment status, income                                                           | PTSD or depression three months after fires                                                     | higher   | Retrospective self-report of exposure       |
| Martin et al. 2013    | top 99% of days from 1994-2007 in Sydney, Newcastle and Wollongong | 3,141,017 non-trauma hospital admissions in Sydney, 273,034 in Wollongong, and 345,736 in Newcastle | Categorized days (high smoke days compared to non-smoke days). Days were classified as 'extreme events' based on if the PM <sub>10</sub> city-wide average from 7 monitoring stations exceeded the 99th percentile for the time series (47.3ug/m3) and the cause of each event was verified to determine days which were due to smoke | High smoke days<br>Sydney PM <sub>10</sub> = 67.3 µg/m <sup>3</sup> , range = (47.3 to 114.8) | Day, month, year, temperature, humidity, dew point, influenza, holidays                                                     | Respiratory and cardiovascular hospitalization                                                  | lower    |                                             |
| McDermott et al. 2005 | 2003 Canberra, Australia wildfires                                 | 222 children                                                                                        | self-reported "saw smoke"                                                                                                                                                                                                                                                                                                             | Not reported                                                                                  | None reported                                                                                                               | post-traumatic stress disorder reaction index score and Strengths& Difficulties Score (based on | higher   | Retrospective self-report of exposure       |

|                    |                                                              |                                                                                                                                                                                                            |                                                                                                                                                                                                                                                                                                                                                                                                                           |                                                                                                         |                                                                                  |                                                                             |          |                                                      |
|--------------------|--------------------------------------------------------------|------------------------------------------------------------------------------------------------------------------------------------------------------------------------------------------------------------|---------------------------------------------------------------------------------------------------------------------------------------------------------------------------------------------------------------------------------------------------------------------------------------------------------------------------------------------------------------------------------------------------------------------------|---------------------------------------------------------------------------------------------------------|----------------------------------------------------------------------------------|-----------------------------------------------------------------------------|----------|------------------------------------------------------|
|                    |                                                              |                                                                                                                                                                                                            |                                                                                                                                                                                                                                                                                                                                                                                                                           |                                                                                                         |                                                                                  | emotional problems, conduct problems, and hyperactivity)                    |          |                                                      |
| Moore et al. 2006  | British Columbia 2003 fires                                  | Studied weekly rates of respiratory physician visits for six weeks in one year compared to ten previous years in two small communities. Population of Kelowna = 146,199. Population of Kamloops = 100,548. | temporal comparison; determined fire affected time periods by PM monitoring at each of two sites (Kelowna and Kamloops)                                                                                                                                                                                                                                                                                                   | Graphics appear to demonstrate effects when $PM_{2.5} > 50 \mu g/m^3$ only for Kelowna and not Kamloops | LHA population, seasonality by temporal comparison                               | physician visits for respiratory, cardiovascular or mental health endpoints | moderate | Small sample size, did not control for temperature   |
| Morgan et al. 2010 | daily exposure in Sydney 1994-2002                           | 3103 days; average daily all-cause mortality = 56                                                                                                                                                          | $PM_{10}$ from 8 monitoring locations, Defined bushfire days as days with city-wide 24hour average $PM_{10}$ greater than the 99th percentile for the study period and verified with newspaper archives and other sources (note that could be bushfires or "fuel-reduction burns") -- and estimated background $PM_{10}$ on bushfire days as the 30-day moving average of $PM_{10}$ when bushfire days are set to missing | Bushfire days range of $PM_{10} = 43-117 \mu g/m^3$                                                     | Background $PM_{10}$ , temperature, humidity, time trend, day of week, influenza | Respiratory or cardiovascular hospitalization                               | lower    |                                                      |
| Mott et al. 2002   | 1999 fire near Hoopa Valley National Indian Res, Aug 23-Nov3 | 289 interviews                                                                                                                                                                                             | temporal comparison                                                                                                                                                                                                                                                                                                                                                                                                       | Not reported in tables                                                                                  | Stratified by time period                                                        | physician visits, respiratory                                               | moderate | Self-reported outcomes, not adjusted for temperature |

|                     |                                                                                                                     |                                                                                                  |                                                                                                                                                                                                                                                                                                                                                                                                              |                                                                                         |                                                                                                                                                                                               |                                                 |          |                                                                                                                                                        |
|---------------------|---------------------------------------------------------------------------------------------------------------------|--------------------------------------------------------------------------------------------------|--------------------------------------------------------------------------------------------------------------------------------------------------------------------------------------------------------------------------------------------------------------------------------------------------------------------------------------------------------------------------------------------------------------|-----------------------------------------------------------------------------------------|-----------------------------------------------------------------------------------------------------------------------------------------------------------------------------------------------|-------------------------------------------------|----------|--------------------------------------------------------------------------------------------------------------------------------------------------------|
| Mott et al. 2005    | 1997 Southeast Asian Fires                                                                                          | Monthly time-series of 35 months used to predict for five months of fire and compare to observed | temporal comparison                                                                                                                                                                                                                                                                                                                                                                                          | Not reported                                                                            | Stratified by time period                                                                                                                                                                     | Respiratory and cardiovascular hospitalizations | moderate | Short time series; did not control for temperature effects                                                                                             |
| Nunes et al. 2013   | Brazilian Amazon 2005                                                                                               | 107 microareas in the Brazilian Amazon                                                           | annual % of hours of PM <sub>2.5</sub> over 25 µg/m <sup>3</sup>                                                                                                                                                                                                                                                                                                                                             | Range of annual % of hours with PM <sub>2.5</sub> > 25 µg/m <sup>3</sup> = 0.00 – 43.89 | controlled for human development index, family health unit, number of intensive care unit beds                                                                                                | Circulatory disease mortality                   | moderate | potentially insufficient control of regional differences related to mortality such as smoking prevalence                                               |
| Prass et al. 2012   | 2001-2005 in Porto Velho, Brazil                                                                                    | 60 months                                                                                        | Number of hot spots detected by the NOAA-12 satellite by month                                                                                                                                                                                                                                                                                                                                               | 61,154 hot spots over 5 year time period; number by month ranged from 0 to 8,775        | Sex, year, month, season                                                                                                                                                                      | Birth weight                                    | higher   | Did not control for temperature or other seasonally varying factors that relate to birth weight; exposure measurement may not relate to smoke exposure |
| Rappold et al. 2011 | 2008 peat bog fire in North Carolina, June 1-July 14, 2008, but 10-12 June were considered the high exposure period | 42 counties (18 exposed); 44 days with three considered high exposure days;                      | Temporal and regional comparison; AOD to define exposed and unexposed counties, dichotomized to exposed if AOD >1.25 and then if >25% of county area was at AOD 1.25 or higher that day is exposed, but then a county was considered exposed if had 2 days in that exposure category; compared the high exposure days to non-exposure days for each county and then compared exposed to non-exposed counties | not reported                                                                            | Day of week, stratified by age and sex. Although did not control for temperature, long-term trend or demographical differences between counties, authors note analyses that demonstrated that | Respiratory and cardiovascular ED visits        | lower    |                                                                                                                                                        |

|                          |                                                                         |                                                                                                    |                                                                                                                |                                                                                                         |                                                                                                                             |                                                      |        |                                                                                 |
|--------------------------|-------------------------------------------------------------------------|----------------------------------------------------------------------------------------------------|----------------------------------------------------------------------------------------------------------------|---------------------------------------------------------------------------------------------------------|-----------------------------------------------------------------------------------------------------------------------------|------------------------------------------------------|--------|---------------------------------------------------------------------------------|
|                          |                                                                         |                                                                                                    |                                                                                                                |                                                                                                         | confounding by these variables was not evident                                                                              |                                                      |        |                                                                                 |
| Resnick et al. 2015      | 2011 Wallow Fire Albuquerque, NM                                        | Over all time periods there were 4525 cardiovascular ED visits and 4164 respiratory ED visits      | Temporal comparison                                                                                            | Mean PM <sub>2.5</sub> during the fires=31.3 µg/m <sup>3</sup>                                          | None reported; stratified by sex and age and time period                                                                    | Respiratory and cardiovascular ED visits             | higher | Did not control for temperature, humidity, day of week, holidays or time trends |
| Sastry 2002              | smoke from the 1997 fires of Indonesia in Malaysia, April-November 1997 | 52,742 deaths                                                                                      | PM <sub>10</sub> for Kuala Lumpur for 1996-1997, used visibility data for other locations and other years      | Mean daily PM <sub>10</sub> = 64.2 ±43.0 µg/m <sup>3</sup> . Range from 16.2 to 423.9 µg/m <sup>3</sup> | Temperature, humidity, long-term trend, seasonality                                                                         | mortality                                            | lower  |                                                                                 |
| Shaposhnikov et al. 2014 | Moscow heat wave and wildfires, summer 2010                             | Time-series analysis from 2006-2010; Moscow averages about 300 deaths per day                      | City-average PM <sub>10</sub>                                                                                  | Not reported                                                                                            | Long-term trend, seasonality, day of week, relative humidity, temperature as an interaction term                            | mortality                                            | lower  |                                                                                 |
| Smith et al. 1996        | January 1994 western Sydney                                             | Average daily asthma attendances at hospitals was 14.1 for control period and 10.7 for fire period | PM <sub>10</sub> from three monitoring stations                                                                | Hourly PM <sub>10</sub> ranged from 0.0 to 250.0 µg/m <sup>3</sup>                                      | Time period (controlled for year and season), temperature, humidity, wind speed, pressure, rainfall, ozone, NO <sub>2</sub> | emergency department visits, asthma                  | lower  |                                                                                 |
| Tham et al. 2009         | January to March 2003, Victoria, Australia                              | 212 days; mean daily respiratory hospital                                                          | PM <sub>10</sub> from one monitoring station in Melbourne, and two others in the Gippsland region of Victoria. | PM <sub>10</sub> range of 0 to 289 µg/m <sup>3</sup>                                                    | Day of week, time trend, temperature, humidity                                                                              | Respiratory hospitalization and emergency department | lower  |                                                                                 |

|                           |                                                                        |                                                                                                                                     |                                                                                                                                             |                                                                                                                                                                                                                                               |                                                                               |                                                                                                                                                              |          |                                                                                                                                                                                       |
|---------------------------|------------------------------------------------------------------------|-------------------------------------------------------------------------------------------------------------------------------------|---------------------------------------------------------------------------------------------------------------------------------------------|-----------------------------------------------------------------------------------------------------------------------------------------------------------------------------------------------------------------------------------------------|-------------------------------------------------------------------------------|--------------------------------------------------------------------------------------------------------------------------------------------------------------|----------|---------------------------------------------------------------------------------------------------------------------------------------------------------------------------------------|
|                           |                                                                        | admissions = 48.43                                                                                                                  |                                                                                                                                             |                                                                                                                                                                                                                                               |                                                                               | visits                                                                                                                                                       |          |                                                                                                                                                                                       |
| Thelen et al. 2013        | 2007 San Diego, whole year including fire                              | 121 days; mean daily ED visits=247.4                                                                                                | HYSPLIT air quality model was run with and without fire emissions estimates to get a way to quantify PM <sub>2.5</sub> just from wildfires. | Modeled PM <sub>2.5</sub> of wildfire origin range 0 to 403 µg/m <sup>3</sup> , with corresponding range of RR of 1.0 to 1.41, but they do not give information to understand at what level of exposure the health effects become significant | Temperature, relative humidity, age groups, income categories, day of week    | emergency department visits, respiratory                                                                                                                     | moderate | Did not control for long term trend or seasonality                                                                                                                                    |
| Tse et al. 2015           | Years before and after the 2003 and 2007 southern California wildfires | 2195 asthmatic children for the 2003 fires and 2965 asthmatic children for the 2007 fires selected from an ongoing pediatric cohort | ZIP codes were classified as fire affected and not fire-affected, but the method for doing so was not explained in the paper                | Not reported                                                                                                                                                                                                                                  | Temporal trends accounted for in using data from a full year before and after | Physician-dispensed short-acting Beta agonists, physician-prescribed oral corticosteroids, ED visits and hospitalizations for asthma, newly diagnosed asthma | moderate | Method of classifying exposure was not made clear; no adjustment for other temporal changes that could affect asthma outcomes such as exposure to tobacco smoke, pollens, temperature |
| Vedal and Dutton 2006     | 2002 June Denver - two days, June 9 and June 18                        | Two days; daily average non-accidental mortality = 35.3                                                                             | regional comparison                                                                                                                         | not reported                                                                                                                                                                                                                                  | Investigates temperature and time but just descriptively, not statistically   | mortality                                                                                                                                                    | higher   | Very low power to detect an effect from just two days                                                                                                                                 |
| Vora et al. 2011          | San Diego 2007 5 day firestorm                                         | 8 subjects followed for 3 periods of four days                                                                                      | Temporal comparison                                                                                                                         | Mean morning PM <sub>2.5</sub> = 71.8 ± 24.5 µg/m <sup>3</sup>                                                                                                                                                                                | Time periods                                                                  | lung function and # of rescue medication doses used                                                                                                          | moderate | Small sample size and did not control for temperature or humidity or exposure to environmental tobacco smoke                                                                          |
| Wiwatana date & Liwsrisak | Chiang Mai, Thailand, August 15,                                       | 121 asthmatic subjects followed for                                                                                                 | Air quality monitor in city center                                                                                                          | PM <sub>2.5</sub> ranged from 13.19 µg/m <sup>3</sup> to 223.83 µg/m <sup>3</sup>                                                                                                                                                             | gender, age, asthma severity, day of week,                                    | Lung function                                                                                                                                                | moderate | Multipollutant models that did not deal with                                                                                                                                          |

|                 |                                         |                                                                                               |                                                                                                                                                                                                                                                               |                                                                                                                                                                  |                                                                                    |                                                                                                                                                                                      |       |                                                             |
|-----------------|-----------------------------------------|-----------------------------------------------------------------------------------------------|---------------------------------------------------------------------------------------------------------------------------------------------------------------------------------------------------------------------------------------------------------------|------------------------------------------------------------------------------------------------------------------------------------------------------------------|------------------------------------------------------------------------------------|--------------------------------------------------------------------------------------------------------------------------------------------------------------------------------------|-------|-------------------------------------------------------------|
| un 2011         | 2005 to June 30, 2006                   | 306 days                                                                                      |                                                                                                                                                                                                                                                               |                                                                                                                                                                  | weight, pressure, temperature, sunshine duration, rain quantity and random effects |                                                                                                                                                                                      |       | collinearity; did not adjust for time trends or seasonality |
| Yao et al. 2014 | British Columbia 2003-2010 fire seasons | 89 local health areas; total population over 4 million, April through September for ten years | PM monitoring data for 29 local health areas; modeled PM <sub>2.5</sub> from a combination of AOD from MODIS, sum of fire radiative power from MODIS hot spots, and hand drawn smoke plumes from the NOAA Hazard Mapping System for all 89 local health areas | Mean daily measured PM <sub>2.5</sub> was 5.9±5.2 µg/m <sup>3</sup> ; Mean daily measured PM <sub>2.5</sub> on extreme fire days was 10.2±11.1 µg/m <sup>3</sup> | Temperature, temporal trends                                                       | Dispensations of salbutamol and nitroglycerin; physician visits for asthma, upper respiratory infections, lower respiratory infections, otitis media and all cardiovascular diseases | lower |                                                             |

Table S2: Effect estimates for original epidemiological research studies (N=53), regardless of level of potential bias, ordered by health outcome and type of effect estimate.

| Article                  | Outcome                   | Lag                 | Type of Effect Estimate                                                                | Effect Estimate                                                                                         | Comment                                                                |
|--------------------------|---------------------------|---------------------|----------------------------------------------------------------------------------------|---------------------------------------------------------------------------------------------------------|------------------------------------------------------------------------|
| Mortality, all-cause     |                           |                     |                                                                                        |                                                                                                         |                                                                        |
| Sastry 2002              | mortality, all-cause      | one day             | RR per 10 $\mu\text{g}/\text{m}^3$ PM <sub>10</sub>                                    | 1.19 (0.98 , 1.41)                                                                                      |                                                                        |
| Morgan et al. 2010       | mortality, all-cause      | one day             | RR per 10 $\mu\text{g}/\text{m}^3$ PM <sub>10</sub>                                    | 1.01 (1.00 , 1.02)                                                                                      | derived from reported percent increase; only best lag is reported here |
| Johnston et al. 2011     | mortality, all-cause      | one day             | OR high smoke versus non-smoke days                                                    | 1.05 (1.00 , 1.10)                                                                                      |                                                                        |
| Faustini et al. 2015     | Mortality, natural        | 0-1 day             | RR smoky versus non-smoky days                                                         | 1.02 (0.99, 1.05)                                                                                       | Derived from reported percent increase                                 |
| Linares et al. 2014      | Mortality, natural        | Lag 2               | RR per 10 $\mu\text{g}/\text{m}^3$ PM <sub>10</sub>                                    | 1.035 (1.011, 1.060)                                                                                    |                                                                        |
| Shaposhnikov et al. 2014 | Mortality, non-accidental | Lags 0-6 cumulative | RR per 10 $\mu\text{g}/\text{m}^3$ PM <sub>10</sub> at different levels of temperature | 1.004 (1.001 – 1.008) at T <18°C<br>1.008 (1.004 – 1.011) at T=22°C<br>1.014 (1.010 – 1.019) at T=>30°C | Derived from reported percent increase                                 |
| Analitis et al. 2011     | mortality, all-cause      | same day            | RR large fire versus no fire days                                                      | 1.50 (1.37 , 1.63)                                                                                      | derived from reported percent increase                                 |
| Mortality, respiratory   |                           |                     |                                                                                        |                                                                                                         |                                                                        |
| Analitis et al. 2011     | mortality, respiratory    | same day            | RR large fire versus no fire days                                                      | 1.92 (1.48 , 2.50)                                                                                      | derived from reported percent increase                                 |
| Johnston et al. 2011     | mortality, respiratory    | one day lag         | OR high smoke versus non-smoke days                                                    | 1.09 (0.88 , 1.36)                                                                                      |                                                                        |

|                           |                                                               |                                  |                                                                                                                   |                                                                                      |                                                                        |
|---------------------------|---------------------------------------------------------------|----------------------------------|-------------------------------------------------------------------------------------------------------------------|--------------------------------------------------------------------------------------|------------------------------------------------------------------------|
| Morgan et al. 2010        | mortality, respiratory                                        | same day                         | RR per 10 $\mu\text{g}/\text{m}^3$ PM <sub>10</sub>                                                               | 1.00 (0.97 , 1.04)                                                                   | derived from reported percent increase; only best lag is reported here |
| Faustini et al. 2015      | Mortality, respiratory                                        | 0-5                              | RR smoky versus non-smoky days                                                                                    | 0.97 (0.90, 1.03)                                                                    | Derived from reported percent increase                                 |
| Linares et al. 2014       | Mortality, respiratory                                        | Lag 2                            | RR per 10 $\mu\text{g}/\text{m}^3$ PM <sub>10</sub>                                                               | No effect reported because it was not statistically significant                      |                                                                        |
| Mortality, cardiovascular |                                                               |                                  |                                                                                                                   |                                                                                      |                                                                        |
| Analitis et al. 2011      | mortality, cardiovascular                                     | same day                         | RR large fire versus no fire days                                                                                 | 1.61 (1.43 , 1.80)                                                                   | derived from reported percent increase                                 |
| Johnston et al. 2011      | mortality, cardiovascular                                     | one day lag                      | OR high smoke versus non-smoke days                                                                               | 1.07 (0.98 , 1.18)                                                                   |                                                                        |
| Morgan et al. 2010        | mortality, cardiovascular                                     | same day                         | RR per 10 $\mu\text{g}/\text{m}^3$ PM <sub>10</sub>                                                               | 1.01 (0.99 , 1.02)                                                                   | derived from reported percent increase; only best lag is reported here |
| Nunes et al. 2013         | Mortality, cardiovascular in people 65 years of age and older | NA (cross-sectional comparison ) | RR for one unit increase in annual percentage of hours greater than 25 $\mu\text{g}/\text{m}^3$ PM <sub>2.5</sub> | 1.01 (p-value reported as 0.035)                                                     | Derived from adjusted beta coefficient from multiple linear regression |
| Faustini et al. 2015      | Mortality, circulatory                                        | 0-5                              | RR smoky versus non-smoky days                                                                                    | 1.06 (1.10, 1.12)                                                                    | Derived from reported percent increase                                 |
| Linares et al. 2014       | Mortality, circulatory                                        | Lag 2                            | RR per 10 $\mu\text{g}/\text{m}^3$ PM <sub>10</sub>                                                               | No effect reported for PM <sub>10</sub> because it was not statistically significant |                                                                        |
| Lung function             |                                                               |                                  |                                                                                                                   |                                                                                      |                                                                        |
| Jacobson et al. 2012      | lung function                                                 | same day                         | change in peak expiratory flow (liters/minute) for non-asthmatics associated with PM <sub>2.5</sub>               | -0.38 (-0.62 , -0.14)                                                                |                                                                        |

|                            |                                   |          |                                                                                                                   |                                                                                                                                                                                           |                                                                                                                                                         |
|----------------------------|-----------------------------------|----------|-------------------------------------------------------------------------------------------------------------------|-------------------------------------------------------------------------------------------------------------------------------------------------------------------------------------------|---------------------------------------------------------------------------------------------------------------------------------------------------------|
| Jacobson et al. 2014       | Lung function                     | Lag 3    | change in peak expiratory flow (liters/minute) for all children regardless of asthma status with PM <sub>10</sub> | -0.25 (-0.40, -0.10)                                                                                                                                                                      | Presented results for all children, but effects were strongest among youngest. Investigated many lags, only presented one here.                         |
| Jalaludin et al. 2000      | lung function                     | same day | change in peak expiratory flow rate - children without bronchial hyper-reactivity                                 | -1.03 (-1.95 , -0.11)                                                                                                                                                                     | calculated from beta and SE - assumed linear model per unit change in PM <sub>10</sub> based on what was presented in the paper                         |
| Respiratory morbidity, all |                                   |          |                                                                                                                   |                                                                                                                                                                                           |                                                                                                                                                         |
| Lee et al. 2009            | physician visits, respiratory     |          | OR per 10 µg/m <sup>3</sup> PM <sub>10</sub>                                                                      | 1.77 (1.51 , 2.09)                                                                                                                                                                        | this RR is for a unit change in the log of PM <sub>10</sub>                                                                                             |
| Henderson et al. 2011      | physician visits, respiratory     | same day | OR per 10 µg/m <sup>3</sup> PM <sub>10</sub>                                                                      | 1.02 (1.01 , 1.03)                                                                                                                                                                        | presented results are associated with monitored values of PM. Similar results were found using modeled and remotely sensed estimates of smoke exposure. |
| Moore et al. 2006          | physician visits, respiratory     |          | observed compared to 10-year mean                                                                                 | 46-78% increase over 10-year mean rates                                                                                                                                                   |                                                                                                                                                         |
| Mott et al. 2002           | physician visits, respiratory     |          | percent increase in fire year compared to percent increase in non-fire year                                       | 11.9% (10.4-13.4) increase in fire year and 8.9% (7.5-10.3) expected from previous year in September, 19.2%(17.2-21.3)in fire year compared to 10.7% (9.1-12.3) increase in previous year |                                                                                                                                                         |
| Lee et al. 2009            | physician visits, all respiratory |          | OR per 10 µg/m <sup>3</sup> PM <sub>10</sub>                                                                      | 1.36 (1.24 , 1.50)                                                                                                                                                                        | this RR is for a unit change in the log of PM <sub>10</sub>                                                                                             |

|                       |                                          |                                                                          |                                                     |                    |                                                                                                                                    |
|-----------------------|------------------------------------------|--------------------------------------------------------------------------|-----------------------------------------------------|--------------------|------------------------------------------------------------------------------------------------------------------------------------|
| Rappold et al. 2011   | emergency department visits, respiratory | lag0-5 cumulative                                                        | RR comparing fire period to reference period        | 1.66 (1.38 , 1.99) | results presented here are for smoke-affected counties only                                                                        |
| Tham et al. 2009      | emergency department visits, respiratory | same day                                                                 | RR per 10 $\mu\text{g}/\text{m}^3$ PM <sub>10</sub> | 1.01 (1.00 , 1.02) | *calculated from 25th-75th range to 10 $\mu\text{g}/\text{m}^3$                                                                    |
| Thelen et al. 2013    | emergency department visits, respiratory | cumulative lag exposure kernel centered at same day and with SD of 1 day | OR per 10 $\mu\text{g}/\text{m}^3$ wildfire PM      | 1.00 (1.00 , 1.01) | original estimates were per unit $\mu\text{g}/\text{m}^3$                                                                          |
| Johnston et al. 2014  | ED visits, respiratory                   | Lag 0                                                                    | OR comparing smoke days to non-smoke days           | 1.07 (1.04, 1.10)  |                                                                                                                                    |
| Resnick et al. 2015   | ED visits, respiratory                   | NA                                                                       | RR comparing fire period to pre-fire period         | 0.83 (0.77, 0.90)  |                                                                                                                                    |
| Tham et al. 2009      | hospitalization, respiratory             | same day                                                                 | RR per 10 $\mu\text{g}/\text{m}^3$ PM <sub>10</sub> | 1.00 (0.99 , 1.01) | calculated from 25th-75th range to 10 $\mu\text{g}/\text{m}^3$                                                                     |
| Morgan et al. 2010    | hospitalization, respiratory             | same day                                                                 | RR per 10 $\mu\text{g}/\text{m}^3$ PM <sub>10</sub> | 1.01 (1.00 , 1.02) | derived from reported percent increase; only best lag is reported here                                                             |
| Henderson et al. 2011 | hospitalization, respiratory             | same day                                                                 | OR per 10 $\mu\text{g}/\text{m}^3$ PM <sub>10</sub> | 1.05 (1.00, 1.10)  | *only presenting here results associated with monitored values of PM. Similar results were found using modeled and remotely sensed |

|                       |                              |                      |                                                                                                                                                               |                                      |                                                                                                                                                            |
|-----------------------|------------------------------|----------------------|---------------------------------------------------------------------------------------------------------------------------------------------------------------|--------------------------------------|------------------------------------------------------------------------------------------------------------------------------------------------------------|
|                       |                              |                      |                                                                                                                                                               |                                      | estimates of smoke exposure.                                                                                                                               |
| Johnston et al. 2007  | hospitalization, respiratory | same day             | OR per 10 $\mu\text{g}/\text{m}^3$ PM <sub>10</sub>                                                                                                           | 1.08 (0.98 , 1.18)                   | for whole population                                                                                                                                       |
| Delfino et al. 2009   | hospitalization, respiratory | 2-day moving average | RR per 10 $\mu\text{g}/\text{m}^3$ PM <sub>2.5</sub>                                                                                                          | 1.03 (1.01 , 1.04)                   | This estimate is for the fire period; paper includes estimates for pre-fire and post-fire periods also                                                     |
| Martin et al. 2013    | hospitalization, respiratory | same day             | OR for high smoke days compared to non-smoke days                                                                                                             | 1.05 (1.02 , 1.09)                   | here only reporting the best lag result for Sydney, not other cities                                                                                       |
| Chen et al. 2006      | hospitalization, respiratory | same day             | RR comparing highest exposure category ( $>20 \mu\text{g}/\text{m}^3$ ) against the lowest category ( $<15 \mu\text{g}/\text{m}^3$ ), for the bushfire period | 1.19 (1.09 , 1.30)                   | comparing highest exposure category ( $>20 \mu\text{g}/\text{m}^3$ ) against the lowest category ( $<15 \mu\text{g}/\text{m}^3$ ), for the bushfire period |
| Cancado et al. 2006   | hospitalization, respiratory |                      | RR for biomass burning factor from factor analysis                                                                                                            | 1.52 (1.12, 2.04)                    | for elderly only; calculated from effect estimate and SE non-exponentiated                                                                                 |
| Mott et al. 2005      | hospitalization, respiratory | NA                   | observed compared to CI of expected                                                                                                                           | 184 observed and 89.3-174.0 expected | all ages                                                                                                                                                   |
| Ignotti et al. 2010   | hospitalization, respiratory |                      | increase in respiratory hospitalizations associated with % annual hours $> 80 \mu\text{g}/\text{m}^3$                                                         | 0.052 increase (p-value=0.017)       | ecological analysis only                                                                                                                                   |
| Asthma, exacerbations |                              |                      |                                                                                                                                                               |                                      |                                                                                                                                                            |

|                                |                                           |                                   |                                                                        |                                                                       |                                                                                                                                 |
|--------------------------------|-------------------------------------------|-----------------------------------|------------------------------------------------------------------------|-----------------------------------------------------------------------|---------------------------------------------------------------------------------------------------------------------------------|
| Jacobson et al. 2012           | lung function                             | same day                          | change in peak expiratory flow for asthmatics                          | -0.18 (-0.66 , 0.31)                                                  |                                                                                                                                 |
| Jalaludin et al. 2000          | lung function                             | same day                          | change in peak expiratory flow rate - all children                     | -0.09 (-1.17 , 0.98)                                                  | calculated from beta and SE - assumed linear model per unit change in PM <sub>10</sub> based on what was presented in the paper |
| Vora et al. 2011               | lung function                             |                                   | difference between fires and non-fires                                 | p-values ranged from 0.35 to 0.80 for different lung function metrics | only p-values reported                                                                                                          |
| Wiwatandate & Liwsrisakun 2011 | lung function                             | lag 6                             | change in peak expiratory flow rate among asthmatic people over age 12 | -0.01 (-0.01, 0.00)                                                   | Lag 5 was also significant for PM <sub>10</sub>                                                                                 |
| Elliott et al. 2013            | drug dispensations, salbutamol sulfate    | Same day                          | RR per 10 µg/m <sup>3</sup> PM <sub>2.5</sub>                          | 1.06 (1.04 , 1.07)                                                    | *these dispensations are for both asthma and COPD, but are placed in the asthma section of this table                           |
| Yao et al. 2014                | drug dispensations, salbutamol sulfate    | Mean of same day and previous day | RR per 10 µg/m <sup>3</sup> PM <sub>2.5</sub>                          | 1.04 (1.03 – 1.06)                                                    | Estimate from modeled PM <sub>2.5</sub> ; similar results for modeled PM <sub>2.5</sub>                                         |
| Tse et al. 2015                | Physician-dispensed Beta-agonists         | NA                                | Compared total for year after fires to year before fires               | p < 0.05                                                              |                                                                                                                                 |
| Tse et al. 2015                | Physician-prescribed oral corticosteroids | NA                                | Compared total for year after fires to year before fires               | p >= 0.05                                                             |                                                                                                                                 |
| Arbex et al. 2000              | Hospital visits for inhalation therapy    | Moving average of days 1-5        | RR per 10 mg sediment weight                                           | 1.09 (1.00 – 1.19)                                                    |                                                                                                                                 |

|                            |                                                    |                                   |                                                                               |                    |                                                                                                                                                                                                                              |
|----------------------------|----------------------------------------------------|-----------------------------------|-------------------------------------------------------------------------------|--------------------|------------------------------------------------------------------------------------------------------------------------------------------------------------------------------------------------------------------------------|
| Caamano-Isorna et al. 2011 | drug dispensations for obstructive airway diseases |                                   | high exposure regions post-fire compared to no exposure regions pre-fire      | 1.18 (1.01, 1.35)  | calculated from percent increase; presenting only results for male pensioners, also sig increase for women pensioners; *these dispensations are for both asthma and COPD, but are placed in the asthma section of this table |
| Vora et al. 2011           | # of rescue medication doses used                  |                                   | only significance values presented for difference between fires and non-fires | p=0.03             |                                                                                                                                                                                                                              |
| Johnston et al. 2006       | rescue medication usage                            | one day                           | OR per 10 $\mu\text{g}/\text{m}^3$ PM <sub>10</sub>                           | 1.01 (0.99, 1.04)  |                                                                                                                                                                                                                              |
| Johnston et al. 2006       | oral steroid medication usage                      | one day                           | OR per 10 $\mu\text{g}/\text{m}^3$ PM <sub>10</sub>                           | 1.54 (1.01, 2.34)  |                                                                                                                                                                                                                              |
| Henderson et al. 2011      | physician visits, asthma                           | same day                          | OR per 10 $\mu\text{g}/\text{m}^3$ PM <sub>10</sub>                           | 1.06 (1.03 , 1.11) | *only presenting here results associated with monitored values of PM. Similar results were found using modeled and remotely sensed estimates of smoke exposure.                                                              |
| Yao et al. 2014            | physician visits, asthma                           | Mean of same day and previous day | RR per 10 $\mu\text{g}/\text{m}^3$ PM <sub>2.5</sub>                          | 1.06 (1.04 – 1.08) | Estimate from modeled PM <sub>2.5</sub> ; similar results for modeled PM <sub>2.5</sub>                                                                                                                                      |

|                      |                                     |                    |                                                     |                          |                                                                                                                                                                                                                                                                                        |
|----------------------|-------------------------------------|--------------------|-----------------------------------------------------|--------------------------|----------------------------------------------------------------------------------------------------------------------------------------------------------------------------------------------------------------------------------------------------------------------------------------|
| Johnston et al. 2002 | emergency department visits, asthma | Same day           | RR per 10 $\mu\text{g}/\text{m}^3$ PM <sub>10</sub> | 1.20 (1.09 , 1.34)       |                                                                                                                                                                                                                                                                                        |
| Rappold et al. 2011  | emergency department visits, asthma | Lag 0-5 cumulative | RR comparing fire period to reference period        | 1.65 (1.25 , 2.17)       | results presented here are for smoke-affected counties only; see paper for comparison to non-smoke affected counties                                                                                                                                                                   |
| Duclos et al. 1990   | emergency department visits, asthma | NA                 | observed/expected                                   | 1.4 (p-value<0.001)      |                                                                                                                                                                                                                                                                                        |
| Smith et al. 1996    | emergency department visits, asthma |                    | difference in difference calculation                | 0.0067 (-0.0007, 0.0141) | temporal comparison of week of fire to same week a year before - presented difference in proportion of all visits that were for asthma for fire weeks compared to previous year minus the same difference for weeks surrounding the fire of both years and found no significant effect |
| Johnston et al. 2014 | ED visits, asthma                   | Lag 0              | OR comparing smoke days to non-smoke days           | 1.23 (1.15, 1.30)        |                                                                                                                                                                                                                                                                                        |
| Resnick et al. 2015  | ED visits, asthma                   | NA                 | RR comparing fire period to pre-fire period         | 1.73 (1.03-2.77)         | this estimate is for ages 65+, non-significant findings for other ages; also found higher effects on women than men                                                                                                                                                                    |

|                       |                                                     |                      |                                                          |                                                      |                                                                                                        |
|-----------------------|-----------------------------------------------------|----------------------|----------------------------------------------------------|------------------------------------------------------|--------------------------------------------------------------------------------------------------------|
|                       |                                                     |                      |                                                          |                                                      | for asthma                                                                                             |
| Tse et al. 2015       | ED visits, asthma among children with asthma        | NA                   | Compared total for year after fires to year before fires | p >= 0.05                                            |                                                                                                        |
| Morgan et al. 2010    | hospitalizations, asthma                            | same day             | RR per 10 µg/m <sup>3</sup> PM <sub>10</sub>             | 1.05 (1.02 , 1.08)                                   | 15-64 year-olds; derived from reported percent increase; only best lag is reported here                |
| Johnston et al. 2007  | hospitalizations, asthma                            | same day             | OR per 10 µg/m <sup>3</sup> PM <sub>10</sub>             | 1.14 (0.90 , 1.44)                                   | for whole population                                                                                   |
| Delfino et al. 2009   | hospitalizations, asthma                            | 2-day moving average | RR per 10 µg/m <sup>3</sup> PM <sub>2.5</sub>            | 1.05 (1.02 , 1.08)                                   | This estimate is for the fire period; paper includes estimates for pre-fire and post-fire periods also |
| Arbex et al. 2007     | hospitalizations, asthma                            | 5-day moving average | RR per 10 units of TSP                                   | 1.12 (1.05 , 1.18)                                   | calculated from percentage increase                                                                    |
| Martin et al. 2013    | hospitalizations, asthma                            | same day             | OR for high smoke days compared to non-smoke days        | 1.12 (1.05 , 1.19)                                   | here only reporting the best lag result for Sydney, not other cities                                   |
| Tse et al. 2015       | hospitalizations, asthma among children with asthma | NA                   | Compared total for year after fires to year before fires | p >= 0.05                                            |                                                                                                        |
| Asthma, new diagnoses |                                                     |                      |                                                          |                                                      |                                                                                                        |
| Tse et al. 2015       | newly diagnosed asthma                              | NA                   | Compared total for year after fires to year before fires | Decline in new asthma diagnoses post-fire (p < 0.05) |                                                                                                        |

| Chronic obstructive pulmonary disease (exacerbations) |                                   |                                   |                                                      |                     |                                                                                                                                                                                        |
|-------------------------------------------------------|-----------------------------------|-----------------------------------|------------------------------------------------------|---------------------|----------------------------------------------------------------------------------------------------------------------------------------------------------------------------------------|
| Yao et al. 2014                                       | physician visits, COPD            | Mean of same day and previous day | RR per 10 $\mu\text{g}/\text{m}^3$ PM <sub>2.5</sub> | 1.02 (1.00 – 1.03)  | Estimate from modeled PM <sub>2.5</sub> ; similar results for modeled PM <sub>2.5</sub>                                                                                                |
| Rappold et al. 2011                                   | emergency department visits, COPD | Lag 0-5 cumulative                | RR comparing fire period to reference period         | 1.73 (1.06 , 2.83)  | results presented here are for smoke-affected counties only; see paper for comparison to non-smoke affected counties                                                                   |
| Duclos et al. 1990                                    | emergency department visits, COPD | NA                                | observed/expected                                    | 1.3 (p-value =0.02) |                                                                                                                                                                                        |
| Johnston et al. 2014                                  | ED visits, COPD                   | Lag 0                             | OR comparing smoke days to non-smoke days            | 1.12 (1.02, 1.24)   |                                                                                                                                                                                        |
| Morgan et al. 2010                                    | hospitalizations, COPD            | lag 2                             | RR per 10 $\mu\text{g}/\text{m}^3$ PM <sub>10</sub>  | 1.04 (1.01 , 1.06)  | Only analyzed COPD for 65+; similar findings for lags 0 through 3, but presented largest finding here at lag 2; derived from reported percent increase; only best lag is reported here |
| Johnston et al. 2007                                  | hospitalizations, COPD            | same day                          | OR per 10 $\mu\text{g}/\text{m}^3$ PM <sub>10</sub>  | 1.21 (1.00 , 1.47)  | for whole population; 1.98 (1.10,3.59) for Indigenous                                                                                                                                  |
| Delfino et al. 2009                                   | hospitalizations, COPD            | 2-day moving average              | RR per 10 $\mu\text{g}/\text{m}^3$ PM <sub>2.5</sub> | 1.04 (1.00 , 1.08)  | Ages 20-99; This estimate is for the fire period; paper includes estimates for pre-fire and post-fire                                                                                  |

|                        |                                                           |                                   |                                                      |                                    |                                                                                                                                                                                                                                       |
|------------------------|-----------------------------------------------------------|-----------------------------------|------------------------------------------------------|------------------------------------|---------------------------------------------------------------------------------------------------------------------------------------------------------------------------------------------------------------------------------------|
|                        |                                                           |                                   |                                                      |                                    | periods also                                                                                                                                                                                                                          |
| Martin et al. 2013     | hospitalizations, COPD                                    | same day                          | OR for high smoke days compared to non-smoke days    | 1.13 (1.05 , 1.22)                 | here only reporting the best lag result for Sydney, not other cities                                                                                                                                                                  |
| Mott et al. 2005       | hospitalizations, COPD                                    | NA                                | observed compared to CI of expected                  | 255 observed, 152.4-250.2 expected | all ages                                                                                                                                                                                                                              |
| Respiratory infections |                                                           |                                   |                                                      |                                    |                                                                                                                                                                                                                                       |
| Henderson et al. 2011  | Physician visits, acute upper respiratory infections      | same day                          | OR per 10 $\mu\text{g}/\text{m}^3$ PM <sub>10</sub>  | 0.99 (0.47 , 1.98)                 | Calculated from effect found for 30 unit change in PM <sub>10</sub> ; *only presenting here results associated with monitored values of PM. Similar results were found using modeled and remotely sensed estimates of smoke exposure. |
| Yao et al. 2014        | physician visits, upper respiratory infections            | Mean of same day and previous day | RR per 10 $\mu\text{g}/\text{m}^3$ PM <sub>2.5</sub> | 1.03 (1.02 – 1.05)                 | Estimate from measured PM <sub>2.5</sub> ; results from modeled PM <sub>2.5</sub> was null and not reported in tabular form.                                                                                                          |
| Yao et al. 2014        | physician visits, lower respiratory infections            | Mean of same day and previous day | RR per 10 $\mu\text{g}/\text{m}^3$ PM <sub>2.5</sub> | 1.03 (1.00 – 1.05)                 | Estimate from modeled PM <sub>2.5</sub> ; similar results for modeled PM <sub>2.5</sub>                                                                                                                                               |
| Rappold et al. 2011    | emergency department visits, upper respiratory infections | Lag 0-5 cumulative                | RR comparing fire period to reference period         | 1.68 (0.94 , 3.00)                 | results presented here are for smoke-affected counties only; see paper for                                                                                                                                                            |

|                          |                                                         |                      |                                                      |                               |                                                                                                                                            |
|--------------------------|---------------------------------------------------------|----------------------|------------------------------------------------------|-------------------------------|--------------------------------------------------------------------------------------------------------------------------------------------|
|                          |                                                         |                      |                                                      |                               | comparison to non-smoke affected counties                                                                                                  |
| Duclos et al. 1990       | hospitalizations, upper respiratory infections          | NA                   | observed/expected                                    | 1.5 (p-value<0.001)           |                                                                                                                                            |
| Johnston et al. 2007     | hospitalizations, upper respiratory infections          |                      | OR per 10 $\mu\text{g}/\text{m}^3$ PM <sub>10</sub>  | Effect Estimate not reported. |                                                                                                                                            |
| Pneumonia and bronchitis |                                                         |                      |                                                      |                               |                                                                                                                                            |
| Rappold et al. 2011      | ED visits for pneumonia and acute bronchitis            | Lag 0-5 cumulative   | RR comparing fire period to reference period         | 1.59 (1.07 , 2.34)            | results presented here are for smoke-affected counties only; see paper for comparison to non-smoke affected counties                       |
| Johnston et al. 2014     | ED visits, pneumonia and bronchitis                     | Lag 0                | OR comparing smoke days to non-smoke days            | 1.02 (0.95, 1.10)             |                                                                                                                                            |
| Delfino et al. 2009      | hospitalizations for acute bronchitis and bronchiolitis | 2-day moving average | RR per 10 $\mu\text{g}/\text{m}^3$ PM <sub>2.5</sub> | 1.10 (1.02 , 1.18)            | Acute bronchitis and bronchiolitis; This estimate is for the fire period; paper includes estimates for pre-fire and post-fire periods also |
| Delfino et al. 2009      | hospitalizations for pneumonia                          | 2-day moving average | RR per 10 $\mu\text{g}/\text{m}^3$ PM <sub>2.5</sub> | 1.03 (1.01, 1.05)             | Pneumonia; This estimate is for the fire period; paper includes estimates for pre-fire and post-fire periods also                          |

|                             |                                                       |                                   |                                                      |                      |                                                                                                                                                                 |
|-----------------------------|-------------------------------------------------------|-----------------------------------|------------------------------------------------------|----------------------|-----------------------------------------------------------------------------------------------------------------------------------------------------------------|
| Morgan et al. 2010          | hospitalizations for pneumonia and acute bronchitis   | lag 1                             | RR per 10 $\mu\text{g}/\text{m}^3$ PM <sub>10</sub>  | 1.03 (1.02 , 1.06)   | pneumonia and acute bronchitis for 65+ attributable to bushfire days; derived from reported percent increase; only best lag is reported here                    |
| Martin et al. 2013          | hospitalizations for pneumonia and acute bronchitis   | lag 2                             | OR for high smoke days compared to non-smoke days    | 1.26 (1.03, 1.55)    | best lag for Newcastle; non-significant findings for Sydney and Wollongong                                                                                      |
| Duclos et al. 1990          | hospitalizations for bronchitis                       | NA                                | observed/expected                                    | 1.2 (p-value = 0.03) | bronchitis                                                                                                                                                      |
| Duclos et al. 1990          | hospitalizations for pneumonia                        | NA                                | observed/expected                                    | 1.0 (p-value = 0.4)  | pneumonia                                                                                                                                                       |
| Cardiovascular disease, all |                                                       |                                   |                                                      |                      |                                                                                                                                                                 |
| Yao et al. 2014             | Dispensations of fast-acting nitroglycerin for angina | Mean of same day and previous day | RR per 10 $\mu\text{g}/\text{m}^3$ PM <sub>2.5</sub> | 1.03 (1.01 – 1.05)   | Effect for extreme fire days; RR was null for all days                                                                                                          |
| Henderson et al. 2011       | physician visits, cardiovascular                      | same day                          | OR per 10 $\mu\text{g}/\text{m}^3$ PM <sub>10</sub>  | 1.00 (0.99 , 1.01)   | *only presenting here results associated with monitored values of PM. Similar results were found using modeled and remotely sensed estimates of smoke exposure. |
| Moore et al. 2006           | physician visits, cardiovascular                      |                                   |                                                      | data not shown       |                                                                                                                                                                 |

|                       |                                             |                                   |                                                      |                                   |                                                                                                                                                                 |
|-----------------------|---------------------------------------------|-----------------------------------|------------------------------------------------------|-----------------------------------|-----------------------------------------------------------------------------------------------------------------------------------------------------------------|
| Lee et al. 2009       | physician visits, all circulatory illness   |                                   | OR per 10 $\mu\text{g}/\text{m}^3$ PM <sub>10</sub>  | 1.13 (0.94 , 1.37)                | this RR is for a unit change in the log of PM <sub>10</sub>                                                                                                     |
| Yao et al. 2014       | physician visits, cardiovascular            | Mean of same day and previous day | RR per 10 $\mu\text{g}/\text{m}^3$ PM <sub>2.5</sub> | Null; data only shown graphically |                                                                                                                                                                 |
| Rappold et al. 2011   | emergency department visits, cardiovascular | Lag 0-5 cumulative                | RR comparing fire period to reference period         | 1.13 (0.95 , 1.35)                | results presented here are for smoke-affected counties only; see paper for comparison to non-smoke affected counties                                            |
| Johnston et al. 2014  | ED visits, COPD                             | Lag 0                             | OR comparing smoke days to non-smoke days            | 1.00 (0.96, 1.04)                 |                                                                                                                                                                 |
| Morgan et al. 2010    | hospitalizations, cardiovascular            | lag 2                             | RR per 10 $\mu\text{g}/\text{m}^3$ PM <sub>10</sub>  | 1.01 (0.99 , 1.01)                | derived from reported percent increase; only best lag is reported here                                                                                          |
| Hanigan et al. 2008   | hospitalizations, cardiovascular            | same day                          | RR per 10 $\mu\text{g}/\text{m}^3$ PM <sub>10</sub>  | 0.97 (0.91 , 1.02)                |                                                                                                                                                                 |
| Henderson et al. 2011 | hospitalizations, cardiovascular            | same day                          | OR per 10 $\mu\text{g}/\text{m}^3$ PM <sub>10</sub>  | 1.00 (0.96 , 1.05)                | *only presenting here results associated with monitored values of PM. Similar results were found using modeled and remotely sensed estimates of smoke exposure. |
| Johnston et al. 2007  | hospitalizations, cardiovascular            |                                   | OR per 10 $\mu\text{g}/\text{m}^3$ PM <sub>10</sub>  | data not shown                    |                                                                                                                                                                 |

|                          |                                                       |                      |                                                      |                    |                                                                                                                      |
|--------------------------|-------------------------------------------------------|----------------------|------------------------------------------------------|--------------------|----------------------------------------------------------------------------------------------------------------------|
| Martin et al. 2013       | hospitalizations, cardiovascular                      |                      | OR for high smoke days compared to non-smoke days    | data not shown     |                                                                                                                      |
| Resnick et al. 2015      | ED visits, all cardiovascular                         | NA                   | RR comparing fire period to pre-fire period          | 1.08 (1.00, 1.16)  |                                                                                                                      |
| Congestive Heart Failure |                                                       |                      |                                                      |                    |                                                                                                                      |
| Rappold et al. 2011      | emergency department visits, congestive heart failure | Lag 0-5 cumulative   | RR comparing fire period to reference period         | 1.37 (1.01 , 1.85) | results presented here are for smoke-affected counties only; see paper for comparison to non-smoke affected counties |
| Morgan et al. 2010       | hospitalizations, congestive heart failure            | lag 2                | RR per 10 $\mu\text{g}/\text{m}^3$ PM <sub>10</sub>  | 1.00 (0.99 , 1.01) | derived from reported percent increase; only best lag is reported here                                               |
| Delfino et al. 2009      | hospitalizations, congestive heart failure            | 2-day moving average | RR per 10 $\mu\text{g}/\text{m}^3$ PM <sub>2.5</sub> | 1.02 (0.99 , 1.04) | This estimate is for the fire period; paper includes estimates for pre-fire and post-fire periods also               |
| Martin et al. 2013       | hospitalizations, congestive heart failure            | lag 3                | OR for high smoke days compared to non-smoke days    | 1.05 (0.96 , 1.14) | here only reporting the best lag result for Sydney, not other cities                                                 |
| Cardiac Failure          |                                                       |                      |                                                      |                    |                                                                                                                      |
| Dennekamp et al. 2015    | out of hospital cardiac arrest                        | 48-hour              | OR per 10 $\mu\text{g}/\text{m}^3$ PM <sub>2.5</sub> | 1.04 (1.00 , 1.08) | OR derived from reported percent increase in IQR PM <sub>2.5</sub>                                                   |
| Johnston et al. 2014     | ED visits, Cardiac failure                            | Lag 0                | OR comparing smoke days to non-smoke days            | 1.05 (0.95, 1.17)  |                                                                                                                      |
| Ischemic heart disease   |                                                       |                      |                                                      |                    |                                                                                                                      |
| Johnston et al. 2014     | ED visits, Ischemic heart disease                     | Lag 2                | OR comparing smoke days to non-smoke days            | 1.07 (1.00, 1.15)  | Non-significant at other lags (0,1, and 3 days)                                                                      |

|                       |                                           |                      |                                                      |                                      |                                                                                                                                                                                                                                       |
|-----------------------|-------------------------------------------|----------------------|------------------------------------------------------|--------------------------------------|---------------------------------------------------------------------------------------------------------------------------------------------------------------------------------------------------------------------------------------|
| Morgan et al. 2010    | hospitalizations, ischemic heart disease  | same day             | RR per 10 $\mu\text{g}/\text{m}^3$ PM <sub>10</sub>  | 1.00 (0.99 , 1.02)                   | derived from reported percent increase; only best lag is reported here                                                                                                                                                                |
| Delfino et al. 2009   | hospitalizations, ischemic heart disease  | 2-day moving average | RR per 10 $\mu\text{g}/\text{m}^3$ PM <sub>2.5</sub> | 1.01 (0.99 , 1.02)                   | This estimate is for the fire period; paper includes estimates for pre-fire and post-fire periods also                                                                                                                                |
| Johnston et al. 2007  | hospitalizations, ischemic heart disease  | same day             | OR per 10 $\mu\text{g}/\text{m}^3$ PM <sub>10</sub>  | 0.82 (0.68 , 0.98)                   | for whole population; 1.71 (1.14,2.55) for Indigenous population                                                                                                                                                                      |
| Martin et al. 2013    | hospitalizations, ischemic heart disease  | lag 2                | OR for high smoke days compared to non-smoke days    | 1.03 (0.98 , 1.08)                   | here only reporting the best lag result for Sydney, not other cities                                                                                                                                                                  |
| Mott et al. 2005      | hospitalizations, ischemic heart disease  | NA                   | observed compared to CI of expected                  | 109 observed when 51.5-91.5 expected | results for ages 19-39 only significant age group                                                                                                                                                                                     |
| Lee et al. 2009       | physician visits, coronary artery disease |                      | OR per 10 $\mu\text{g}/\text{m}^3$ PM <sub>10</sub>  | 1.48 (1.11 , 1.97)                   | this RR is for a unit change in the log of PM <sub>10</sub>                                                                                                                                                                           |
| Resnick et al. 2015   | ED visits, ischemic heart disease         | NA                   | RR comparing fire period to pre-fire period          | 1.17 (0.89, 1.55)                    |                                                                                                                                                                                                                                       |
| Hypertension          |                                           |                      |                                                      |                                      |                                                                                                                                                                                                                                       |
| Henderson et al. 2011 | physician visits, hypertension            | same day             | OR per 10 $\mu\text{g}/\text{m}^3$ PM <sub>10</sub>  | 1.00 (0.98 , 1.01)                   | Calculated from effect found for 30 unit change in PM <sub>10</sub> ; *only presenting here results associated with monitored values of PM. Similar results were found using modeled and remotely sensed estimates of smoke exposure. |

|                         |                                                      |                      |                                                      |                    |                                                                                                        |
|-------------------------|------------------------------------------------------|----------------------|------------------------------------------------------|--------------------|--------------------------------------------------------------------------------------------------------|
| Arbex et al. 2010       | hospitalizations, hypertension                       | 3-day moving average | RR per 10 $\mu\text{g}/\text{m}^3$ TSP               | 1.13 (1.06 , 1.20) | burning season estimate was 30% higher than non-burning season; calculated from percent increase       |
| Resnick et al. 2015     | ED visits, hypertensive disease                      | NA                   | RR comparing fire period to pre-fire period          | 1.08 (0.97, 1.20)  |                                                                                                        |
| Cardiac dysrhythmias    |                                                      |                      |                                                      |                    |                                                                                                        |
| Johnston et al. 2014    | ED visits, arrhythmias                               | Lag 0                | OR comparing smoke days to non-smoke days            | 0.97 (0.89, 1.06)  |                                                                                                        |
| Delfino et al. 2009     | hospitalizations, dysrhythmias                       | 2-day moving average | RR per 10 $\mu\text{g}/\text{m}^3$ PM <sub>2.5</sub> | 0.99 (0.96 , 1.02) | This estimate is for the fire period; paper includes estimates for pre-fire and post-fire periods also |
| Martin et al. 2013      | hospitalizations, arrhythmia                         | lag 2                | OR for high smoke days compared to non-smoke days    | 0.96 (0.88 , 1.04) | here only reporting the best lag result for Sydney, not other cities                                   |
| Cerebrovascular disease |                                                      |                      |                                                      |                    |                                                                                                        |
| Johnston et al. 2014    | ED visits, cerebrovascular disease                   | Lag 0                | OR comparing smoke days to non-smoke days            | 0.99 (0.91, 1.08)  |                                                                                                        |
| Resnick et al. 2015     | ED visits, cerebrovascular disease                   | NA                   | RR comparing fire period to pre-fire period          | 1.69 (1.03, 2.77)  | This estimate is just for ages 20-64; non-significant findings for 65+ and for 0-19                    |
| Delfino et al. 2009     | hospitalizations, cerebrovascular disease and stroke | 2-day moving average | RR per 10 $\mu\text{g}/\text{m}^3$ PM <sub>2.5</sub> | 1.02 (1.00 , 1.04) | This estimate is for the fire period; paper includes estimates for pre-fire and post-fire periods also |

|                              |                                                     |       |                                                                                                                                                 |                                                         |                                                                                       |
|------------------------------|-----------------------------------------------------|-------|-------------------------------------------------------------------------------------------------------------------------------------------------|---------------------------------------------------------|---------------------------------------------------------------------------------------|
| Morgan et al. 2010           | hospitalizations, stroke                            | lag 2 | RR per 10 $\mu\text{g}/\text{m}^3$ PM <sub>10</sub>                                                                                             | 1.01 (0.99 , 1.03)                                      | just stroke, converted from percentage increase                                       |
| Birth outcomes               |                                                     |       |                                                                                                                                                 |                                                         |                                                                                       |
| Holstius et al. 2012         | birth weight                                        | NA    | decline in birth weight associated with gestation during fires compared to gestation not during fires                                           | 7.0 g lower [95% confidence interval (CI): -11.8, -2.2] | only presenting results for full pregnancy, not divided by trimester                  |
| Breton et al. 2011           | birth weight                                        | NA    |                                                                                                                                                 | not yet published                                       | these findings have not yet been published, therefore we cannot publish the estimates |
| Jayachandran 2009            | cohort size                                         | NA    | proportion of cohort surviving compared to normal cohort due to exposure to fire smoke during last three months of pregnancy                    | 0.97 (0.94, 0.99)                                       | calculated from log effect estimate and SE                                            |
| Candido da Silva et al. 2014 | Low birth weight                                    | NA    | OR of low birth weight associated with PM2.5 during second and third trimester for highest exposed quartile compared to lowest exposed quartile | 1.51 (1.04, 2.17)                                       | *Only presented second trimester results                                              |
| Prass et al. 2012            | Birth weight                                        | NA    | effect of monthly number of satellite detected hot spots on mean monthly birth weight in boys                                                   | -0.004485, p-value = 0.0431                             | Did not find an effect of monthly hot spots on monthly birth weight for girls         |
| Mental Health                |                                                     |       |                                                                                                                                                 |                                                         |                                                                                       |
| McDermott et al. 2005        | post-traumatic stress disorder reaction index score | NA    | t-test for comparing scores for those who reported seeing smoke to those who reported not seeing smoke                                          | t=1.63, p=0.11                                          | p-value calculated from reported t-test and degrees of freedom                        |

|                            |                                                                                                  |    |                                                                                                        |                                                                                                                   |                                                                                                                                                                                                |
|----------------------------|--------------------------------------------------------------------------------------------------|----|--------------------------------------------------------------------------------------------------------|-------------------------------------------------------------------------------------------------------------------|------------------------------------------------------------------------------------------------------------------------------------------------------------------------------------------------|
| McDermott et al. 2005      | Strengths& Difficulties Score (based on emotional problems, conduct problems, and hyperactivity) | NA | t-test for comparing scores for those who reported seeing smoke to those who reported not seeing smoke | t=3.76, p=0.0003                                                                                                  | p-value calculated from reported t-test and degrees of freedom                                                                                                                                 |
| Marshall et al. 2007       | PTSD or depression three months after fires                                                      | NA | OR for those who reported difficulty breathing because of fires compared to those who did not          | 2.09 (1.10, 3.98)                                                                                                 |                                                                                                                                                                                                |
| Caamano-Isorna et al. 2011 | drug dispensations for anxiolytics                                                               | NA | high exposure regions post-fire compared to no exposure regions pre-fire                               | 1.21 (1.10, 1.33)                                                                                                 | calculated from percent increase; presenting only results for male pensioners, also sig increase for male non-pensioners; only significant for medium exposure regions compared to non-exposed |
| Moore et al. 2006          | physician visits, mental illness                                                                 | NA |                                                                                                        | data not shown                                                                                                    |                                                                                                                                                                                                |
| Duclos et al. 1990         | hospitalizations, mental health                                                                  | NA | observed/expected                                                                                      | 1.1 (p-value=0.4)                                                                                                 |                                                                                                                                                                                                |
| Ho et al. 2014             | Impact of Event Scale – Revised Survey, measure of psychological stress                          | NA | Chi-squared                                                                                            | Those who perceived lower PSI values as dangerous were more likely to have higher IES-R stress values (p = 0.047) |                                                                                                                                                                                                |

\*effect estimates for symptoms are not included in this table because of their varied nature.

## References

- Analitis A, Georgiadis I, Katsouyanni K. 2012. Forest fires are associated with elevated mortality in a dense urban setting. *Occup Environ Med* 69:158-162.
- Arbex MA, Bohm GM, Saldiva PH, Conceicao GM, Pope AC 3rd, Braga AL. 2000. Assessment of the effects of sugar cane plantation burning on daily counts of inhalation therapy. *J Air Waste Manag Assoc* (1995) 50:1745-1749.
- Arbex MA, Martins LC, de Oliveira RC, Pereira LAA, Arbex FF, Cancado JED, et al. 2007. Air pollution from biomass burning and asthma hospital admissions in a sugar cane plantation area in Brazil. *J Epidemiol Community Health* 61:395-400.
- Arbex MA, Saldiva PHN, Pereira LAA, Braga ALF. 2010. Impact of outdoor biomass air pollution on hypertension hospital admissions. *J Epidemiol Community Health* 64:573-579.
- Azevedo JM, Goncalves FL, de Fatima Andrade M. 2011. Long-range ozone transport and its impact on respiratory and cardiovascular health in the north of Portugal. *Int J Biometeorol* 55:187-202.
- Brook RD, Rajagopalan S, Pope CA 3rd, Brook JR, Bhatnagar A, Diez-Roux AV, et al. 2010. Particulate matter air pollution and cardiovascular disease: An update to the scientific statement from the American Heart Association. *Circulation* 121:2331-2378.
- Caamano-Isorna F, Figueiras A, Sastre I, Montes-Martinez A, Taracido M, Pineiro-Lamas M. 2011. Respiratory and mental health effects of wildfires: An ecological study in Galician municipalities (north-west Spain). *Environ health* 10:48.

- Cancado JE, Saldiva PHN, Pereira LAA, Lara L, Artaxo P, Martinelli LA, et al. 2006. The impact of sugar cane-burning emissions on the respiratory system of children and the elderly. *Environ Health Perspect* 114:725-729.
- Candido da Silva AM, Moi GP, Mattos IE, Hacon Sde S. 2014. Low birth weight at term and the presence of fine particulate matter and carbon monoxide in the Brazilian Amazon: A population-based retrospective cohort study. *BMC Pregnancy Childbirth* 14:309.
- Chen L, Verrall K, Tong S. 2006. Air particulate pollution due to bushfires and respiratory hospital admissions in Brisbane, Australia. *Int J Environ Res Public Health* 16:181-191.
- Cooper CW, Mira M, Danforth M, Abraham K, Fasher B, Bolton P. 1994. Acute exacerbations of asthma and bushfires. *Lancet* 343:1509.
- Delfino RJ, Brummel S, Wu J, Stern H, Ostro B, Lipsett M, et al. 2009. The relationship of respiratory and cardiovascular hospital admissions to the southern California wildfires of 2003. *Occup Environ Med* 66:189-197.
- Delfino RJ, Staimer N, Tjoa T, Arhami M, Polidori A, Gillen DL, et al. 2010. Associations of primary and secondary organic aerosols with airway and systemic inflammation in an elderly panel cohort. *Epidemiol* 21:892-902.
- Dennekamp M, Abramson MJ. 2011. The effects of bushfire smoke on respiratory health. *Respirology* 16:198-209.
- Dennekamp M, Straney LD, Erbas B, Abramson MJ, Keywood M, Smith K, et al. 2015. Forest fire smoke exposures and out-of-hospital cardiac arrests in Melbourne, Australia: A case-crossover study. *Environ Health Perspect*. doi:10.1289/ehp.1408436

- Duclos P, Sanderson LM, Lipsett M. 1990. The 1987 forest fire disaster in California: Assessment of emergency room visits. *Arch Environ Health* 45:53-58.
- Elliott CT, Henderson SB, Wan V. 2013. Time series analysis of fine particulate matter and asthma reliever dispensations in populations affected by forest fires. *Environ Health* 12:11.
- Faustini A, Alessandrini ER, Pey J, Perez N, Samoli E, Querol X, et al. 2015. Short-term effects of particulate matter on mortality during forest fires in southern Europe: Results of the MED-PARTICLES project. *Occup Environ Med* 72:323-329.
- Finlay SE, Moffat A, Gazzard R, Baker D, Murray V. 2012. Health impacts of wildfires. *PLoS currents* 4:e4f959951cce959952c.
- Flannigan M, Cantin AS, de Groot WJ, Wotton M, Newbery A, Gowman LM. 2013. Global wildland fire season severity in the 21st century. *Forest Ecol Manag* 294:54-61.
- Flannigan MD, Krawchuk MA, de Groot WJ, Wotton BM, Gowman LM. 2009. Implications of changing climate for global wildland fire. *Int J Wildland Fire* 18:483-507.
- Franzi LM, Bratt JM, Williams KM, Last JA. 2011. Why is particulate matter produced by wildfires toxic to lung macrophages? *Toxicol Appl Pharmacol* 257:182-188.
- Gehring U, Tamburic L, Sbihi H, Davies HW, Brauer M. 2014. Impact of noise and air pollution on pregnancy outcomes. *Epidemiology* 25:351-358.
- Gillett NP, Weaver AJ, Zwiers FW, Flannigan MD. 2004. Detecting the effect of climate change on Canadian forest fires. *Geophysical Research Letters* 31. doi:10.1029/2004GL020876

- Haikerwal A, Akram M, Del Monaco A, Smith K, Sim MR, Meyer M, et al. 2015. Impact of fine particulate matter (PM<sub>2.5</sub>) exposure during wildfires on cardiovascular health outcomes. *J Am Heart Assoc* 4:e001653 doi:10.1161/JAHA.114.001653.
- Hanigan IC, Johnston FH, Morgan GG. 2008. Vegetation fire smoke, indigenous status and cardio-respiratory hospital admissions in Darwin, Australia, 1996-2005: A time-series study. *Environ Health* 7:42.
- Henderson SB, Brauer M, Macnab YC, Kennedy SM. 2011. Three measures of forest fire smoke exposure and their associations with respiratory and cardiovascular health outcomes in a population-based cohort. *Environ Health Perspect* 119:1266-1271.
- Henderson SB, Johnston FH. 2012. Measures of forest fire smoke exposure and their associations with respiratory health outcomes. *Curr Opin Allergy Clin Immunol* 12:221-227.
- Ho RC, Zhang MW, Ho CS, Pan F, Lu Y, Sharma VK. 2014. Impact of 2013 south Asian haze crisis: Study of physical and psychological symptoms and perceived dangerousness of pollution level. *BMC Psychiatry* 14:81.
- Holstius DM, Reid CE, Jesdale BM, Morello-Frosch R. 2012. Birth weight following pregnancy during the 2003 southern California wildfires. *Environ Health Perspect* 120:1340-1345.
- Ignotti E, Valente JG, Longo KM, Freitas SR, Hacon SD, Netto PA. 2010. Impact on human health of particulate matter emitted from burnings in the Brazilian Amazon region. *Rev Saude Publica* 44:121-130.

- Jacobson LSV, Hacon S, Castro HA, Ignotti E, Artaxo P, Ponce de Leon AC. 2012. Association between fine particulate matter and the peak expiratory flow of schoolchildren in the Brazilian subequatorial amazon: A panel study. *Environ Res* 117:27-35.
- Jacobson LSV, Hacon Sde S, Castro HA, Ignotti E, Artaxo P, Saldiva PH, et al. 2014. Acute effects of particulate matter and black carbon from seasonal fires on peak expiratory flow of schoolchildren in the Brazilian Amazon. *PloS One* 9:e104177.
- Jalaludin B, Smith M, O'Toole B, Leeder S. 2000. Acute effects of bushfires on peak expiratory flow rates in children with wheeze: A time series analysis. *Aust N Z J Public Health* 24:174-177.
- Jayachandran S. 2009. Air quality and early-life mortality evidence from Indonesia's wildfires. *J Hum Resour* 44:916-954.
- Johnston FH, Bailie RS, Pilotto LS, Hanigan IC. 2007. Ambient biomass smoke and cardio-respiratory hospital admissions in Darwin, Australia. *BMC Public Health* 7:240.
- Johnston F, Hanigan I, Henderson S, Morgan G, Bowman D. 2011. Extreme air pollution events from bushfires and dust storms and their association with mortality in Sydney, Australia 1994-2007. *Environ Res* 111:811-816.
- Johnston FH, Henderson SB, Chen Y, Randerson JT, Marlier M, Defries RS, et al. 2012. Estimated global mortality attributable to smoke from landscape fires. *Environ Health Perspect* 120:695-701.
- Johnston FH, Kavanagh AM, Bowman D, Scott RK. 2002. Exposure to bushfire smoke and asthma: An ecological study. *Med J Aust* 176:535-538.

- Johnston FH, Purdie S, Jalaludin B, Martin KL, Henderson SB, Morgan GG. 2014. Air pollution events from forest fires and emergency department attendances in Sydney, Australia 1996-2007: A case-crossover analysis. *Environ Health* 13:105.
- Johnston FH, Webby RJ, Pilotto LS, Bailie RS, Parry DL, Halpin SJ. 2006. Vegetation fires, particulate air pollution and asthma: A panel study in the Australian monsoon tropics. *Int J Environ Health Res* 16:391-404.
- Kong K, Coates HL. 2009. Natural history, definitions, risk factors and burden of otitis media. *Med J Aust* 191:S39-43.
- Lakshmi PV, Viridi NK, Sharma A, Tripathy JP, Smith KR, Bates MN, et al. 2013. Household air pollution and stillbirths in India: Analysis of the dlhs-ii national survey. *Environ Res* 121:17-22.
- Lee TS, Falter K, Meyer P, Mott J, Gwynn C. 2009. Risk factors associated with clinic visits during the 1999 forest fires near the Hoopa Valley Indian Reservation, California, USA. *Int J Environ Health Res* 19:315-327.
- Leonard SS, Castranova V, Chen BT, Schwegler-Berry D, Hoover M, Piacitelli C, et al. 2007. Particle size-dependent radical generation from wildland fire smoke. *Toxicology* 236:103-113.
- Linares C, Carmona R, Tobias A, Miron IJ, Diaz J. 2014. Influence of advections of particulate matter from biomass combustion on specific-cause mortality in Madrid in the period 2004-2009. *Environ Sci Pollut Res*. doi:10.1007/s11356-014-3916-2.

- Liu JC, Pereira G, Uhl SA, Bravo MA, Bell ML. 2014. A systematic review of the physical health impacts from non-occupational exposure to wildfire smoke. *Environ Res* 136c:120-132.
- MacIntyre EA, Karr CJ, Koehoorn M, Demers PA, Tamburic L, Lencar C, et al. 2011. Residential air pollution and otitis media during the first two years of life. *Epidemiology* 22:81-89.
- Marshall GN, Schell TL, Elliott MN, Rayburn NR, Jaycox LH. 2007. Psychiatric disorders among adults seeking emergency disaster assistance after a wildland-urban interface fire. *Psychiatr Serv* 58:509-514.
- Martin KL, Hanigan IC, Morgan GG, Henderson SB, Johnston FH. 2013. Air pollution from bushfires and their association with hospital admissions in Sydney, Newcastle and Wollongong, Australia 1994-2007. *Aust NZ J Public Health* 37:238-243.
- Mazzoli-Rocha F, Magalhaes CB, Malm O, Saldiva PH, Zin WA, Faffe DS. 2008. Comparative respiratory toxicity of particles produced by traffic and sugar cane burning. *Environ Res* 108:35-41.
- McDermott BM, Lee EM, Judd M, Gibbon P. 2005. Posttraumatic stress disorder and general psychopathology in children and adolescents following a wildfire disaster. *Can J Psychiatry* 50:137-143.
- Miller LA, Schelegle ES, Capitanio JP, Clay CC, Walby WF. 2013. Persistent immune effects of wildfire PM exposure during childhood development. California Air Resources Board Contract Number 10-303

- Moore D, Copes R, Fisk R, Joy R, Chan K, Brauer M. 2006. Population health effects of air quality changes due to forest fires in British Columbia in 2003: Estimates from physician-visit billing data. *Can J Public Health* 97:105-108.
- Morgan G, Sheppard V, Khalaj B, Ayyar A, Lincoln D, Jalaludin B, et al. 2010. Effects of bushfire smoke on daily mortality and hospital admissions in Sydney, Australia. *Epidemiology* 21:47-55.
- Mott JA, Mannino DM, Alverson CJ, Kiyu A, Hashim J, Lee T, et al. 2005. Cardiorespiratory hospitalizations associated with smoke exposure during the 1997 southeast Asian forest fires. *Int J Hyg Environ Health* 208:75-85.
- Mott JA, Meyer P, Mannino D, Redd SC, Smith EM, Gotway-Crawford C, et al. 2002. Wildland forest fire smoke: Health effects and intervention evaluation, Hoopa, California, 1999. *West J Med* 176:157-162.
- Myatt TA, Vincent MS, Kobzik L, Naeher LP, MacIntosh DL, Suh H. 2011. Markers of inflammation in alveolar cells exposed to fine particulate matter from prescribed fires and urban air. *J Occup Environ Med* 53:1110-1114.
- Naeher LP, Brauer M, Lipsett M, Zelikoff JT, Simpson CD, Koenig JQ, et al. 2007. Woodsmoke health effects: A review. *Inhal Toxicol* 19:67-106.
- Nakayama Wong LS, Aung HH, Lame MW, Wegesser TC, Wilson DW. 2011. Fine particulate matter from urban ambient and wildfire sources from California's San Joaquin Valley initiate differential inflammatory, oxidative stress, and xenobiotic responses in human bronchial epithelial cells. *Toxicol In Vitro* 25:1895-1905.

- Nunes KV, Ignotti E, Hacon Sde S. 2013. Circulatory disease mortality rates in the elderly and exposure to PM<sub>2.5</sub> generated by biomass burning in the Brazilian amazon in 2005. *Cad Saude Publica* 29:589-598.
- Papanikolaou V, Adamis D, Mellon RC, Prodromitis G. 2011. Psychological distress following wildfires disaster in a rural part of Greece: A case-control population-based study. *Int J Emerg Ment Health* 13:11-26.
- Pavagadhi S, Betha R, Venkatesan S, Balasubramanian R, Hande MP. 2013. Physicochemical and toxicological characteristics of urban aerosols during a recent Indonesian biomass burning episode. *Environ Sci Pollut Res Int* 20:2569-2578.
- Prass TS, Lopes SR, Dorea JG, Marques RC, Brandao KG. 2012. Amazon forest fires between 2001 and 2006 and birth weight in Porto Velho. *Bull Environ Contam Toxicol* 89:1-7.
- Rappold AG, Cascio WE, Kilaru VJ, Stone SL, Neas LM, Devlin RB, et al. 2012. Cardio-respiratory outcomes associated with exposure to wildfire smoke are modified by measures of community health. *Environ Health* 11:71.
- Rappold AG, Stone SL, Cascio WE, Neas LM, Kilaru VJ, Carraway MS, et al. 2011. Peat bog wildfire smoke exposure in rural North Carolina is associated with cardiopulmonary emergency department visits assessed through syndromic surveillance. *Environ Health Perspect* 119:1415-1420.
- Resnick A, Woods B, Krapfl H, Toth B. 2015. Health outcomes associated with smoke exposure in Albuquerque, New Mexico, during the 2011 wallow fire. *J Public Health Manag Pract*. 21 Suppl 2:S55-61.

Sastry N. 2002. Forest fires, air pollution, and mortality in southeast asia. *Demography* 39:1-23.

Settele J, Scholes R, Betts R, Bunn S, Leadley P, Nepstad D, Overpeck JT, Taboada MA, 2014:

Terrestrial and inland water systems. In: *Climate Change 2014: Impacts, Adaptation, and Vulnerability. Part A: Global and Sectoral Aspects. Contribution of Working Group II to the Fifth Assessment Report of the Intergovernmental Panel on Climate Change* [Field, C.B., V.R. Barros, D.J. Dokken, K.J. Mach, M.D. Mastrandrea, T.E. Bilir, M. Chatterjee, K.L. Ebi, Y.O. Estrada, R.C. Genova, B. Girma, E.S. Kissel, A.N. Levy, S. MacCracken, P.R. Mastrandrea, L.L. White (eds.)]. Cambridge University Press, Cambridge, United Kingdom and New York, NY, USA, pp. 271-359.

Shaposhnikov D, Revich B, Bellander T, Bedada GB, Bottai M, Kharkova T, et al. 2014.

Mortality related to air pollution with the Moscow heat wave and wildfire of 2010. *Epidemiology* 25:359-364.

Silveira HC, Schmidt-Carrijo M, Seidel EH, Scapulatempo-Neto C, Longatto-Filho A, Carvalho AL, et al. 2013. Emissions generated by sugarcane burning promote genotoxicity in rural workers: A case study in Barretos, Brazil. *Environ Health* 12:87.

Sisenando HA, Batistuzzo de Medeiros SR, Artaxo P, Saldiva PH, Hacon Sde S. 2012.

Micronucleus frequency in children exposed to biomass burning in the Brazilian legal amazon region: A control case study. *BMC Oral Health* 12:6.

Smith MA, Jalaludin B, Byles JE, Lim L, Leeder SR. 1996. Asthma presentations to emergency departments in western Sydney during the January 1994 bushfires. *Int J Epidemiol* 25:1227-1236.

- Tan WC, Qiu DW, Liam BL, Ng TP, Lee SH, van Eeden SF, et al. 2000. The human bone marrow response to acute air pollution caused by forest fires. *Am J Respir Crit Care Med* 161:1213-1217.
- Tham R, Erbas B, Akram M, Dennekamp M, Abramson MJ. 2009. The impact of smoke on respiratory hospital outcomes during the 2002-2003 bushfire season, Victoria, Australia. *Respirology* 14:69-75.
- Thelen B, French NH, Koziol BW, Billmire M, Owen RC, Johnson J, et al. 2013. Modeling acute respiratory illness during the 2007 San Diego wildland fires using a coupled emissions-transport system and generalized additive modeling. *Environ Health* 12:94.
- Tse K, Chen L, Tse M, Zuraw B, Christiansen S. 2015. Effect of catastrophic wildfires on asthmatic outcomes in obese children: Breathing fire. *Ann Allergy Asthma Immunol* 114:308-311 e304.
- van Eeden SF, Tan WC, Suwa T, Mukae H, Terashima T, Fujii T, et al. 2001. Cytokines involved in the systemic inflammatory response induced by exposure to particulate matter air pollutants (PM<sub>10</sub>). *Am J Respir Crit Care Med* 164:826-830.
- Vedal S, Dutton SJ. 2006. Wildfire air pollution and daily mortality in a large urban area. *Environ Res* 102:29-35.
- Vora C, Renvall MJ, Chao P, Ferguson P, Ramsdell JW. 2011. 2007 San Diego wildfires and asthmatics. *Journal Asthma* 48:75-78.

- Wegesser TC, Franzi LM, Mitloehner FM, Eiguren-Fernandez A, Last JA. 2010. Lung antioxidant and cytokine responses to coarse and fine particulate matter from the great California wildfires of 2008. *Inhal Toxicol* 22:561-570.
- Wegesser TC, Pinkerton KE, Last JA. 2009. California wildfires of 2008: Coarse and fine particulate matter toxicity. *Environ Health Perspect* 117:893-897.
- Westerling AL, Hidalgo HG, Cayan DR, Swetnam TW. 2006. Warming and earlier spring increase western us forest wildfire activity. *Science* 313:940-943.
- Williams KM, Franzi LM, Last JA. 2013. Cell-specific oxidative stress and cytotoxicity after wildfire coarse particulate matter instillation into mouse lung. *Toxicol Appl Pharmacol* 266:48-55.
- Wiwatanadate P, Liwsrisakun C. 2011. Acute effects of air pollution on peak expiratory flow rates and symptoms among asthmatic patients in Chiang Mai, Thailand. *Int J Hyg Environ Health* 214:251-257.
- Woodruff TJ, Parker JD, Adams K, Bell ML, Gehring U, Glinianaia S, et al. 2010. International collaboration on air pollution and pregnancy outcomes (ICAPPO). *Int J Environ Res Public Health* 7:2638-2652.
- Woodruff TJ, Sutton P. 2014. The navigation guide systematic review methodology: A rigorous and transparent method for translating environmental health science into better health outcomes. *Environ Health Perspect* 122:1007-1014.

Yao J, Eyamie J, Henderson SB. 2014. Evaluation of a spatially resolved forest fire smoke model for population-based epidemiologic exposure assessment. *J Expo Sci Environ Epidemiol*. doi:10.1038/jes.2014.67

Youssof H, Liousse C, Roblou L, Assamoi EM, Salonen RO, Maesano C, et al. 2014. Non-accidental health impacts of wildfire smoke. *Int J Environ Res Public Health* 11:11772-11804.

Zelikoff JT, Chen LC, Cohen MD, Schlesinger RB. 2002. The toxicology of inhaled woodsmoke. *J Toxicol Environ Health B Crit Rev* 5:269-282.
